# Supplementary material for: Mechanistic theory predicts the effects of temperature and humidity on inactivation of SARS-CoV-2 and other enveloped viruses
Source: eLife journal article supplement (doi:10.7554/elife.65902), 2021-04-27
Supplement: supp [file elife-65902-supp-v1.zip]

Archive with 11 entries (11 files):
- elife_poa_e65902_Transparent_Reporting_File.pdf
- elife_poa_e65902_Figure_1_figure_supplement_1.pdf
- elife_poa_e65902_Figure_1_figure_supplement_2.pdf
- elife_poa_e65902_Figure_1_figure_supplement_3.pdf
- elife_poa_e65902_Figure_2_figure_supplement_1.pdf
- elife_poa_e65902_Figure_2_figure_supplement_2.pdf
- elife_poa_e65902_Figure_2_figure_supplement_3.pdf
- elife_poa_e65902_Figure_2_figure_supplement_4.pdf
- elife_poa_e65902_Figure_2_figure_supplement_5.pdf
- elife_poa_e65902_Figure_2_figure_supplement_6.pdf
- elife_poa_e65902_Figure_3_figure_supplement_1.pdf
