# Supplementary figures and images for: Mechanistic theory predicts the effects of temperature and humidity on inactivation of SARS-CoV-2 and other enveloped viruses
Source: eLife journal article supplement (doi:10.7554/elife.65902), 2021-04-27

temperature (°C)

10

22

27

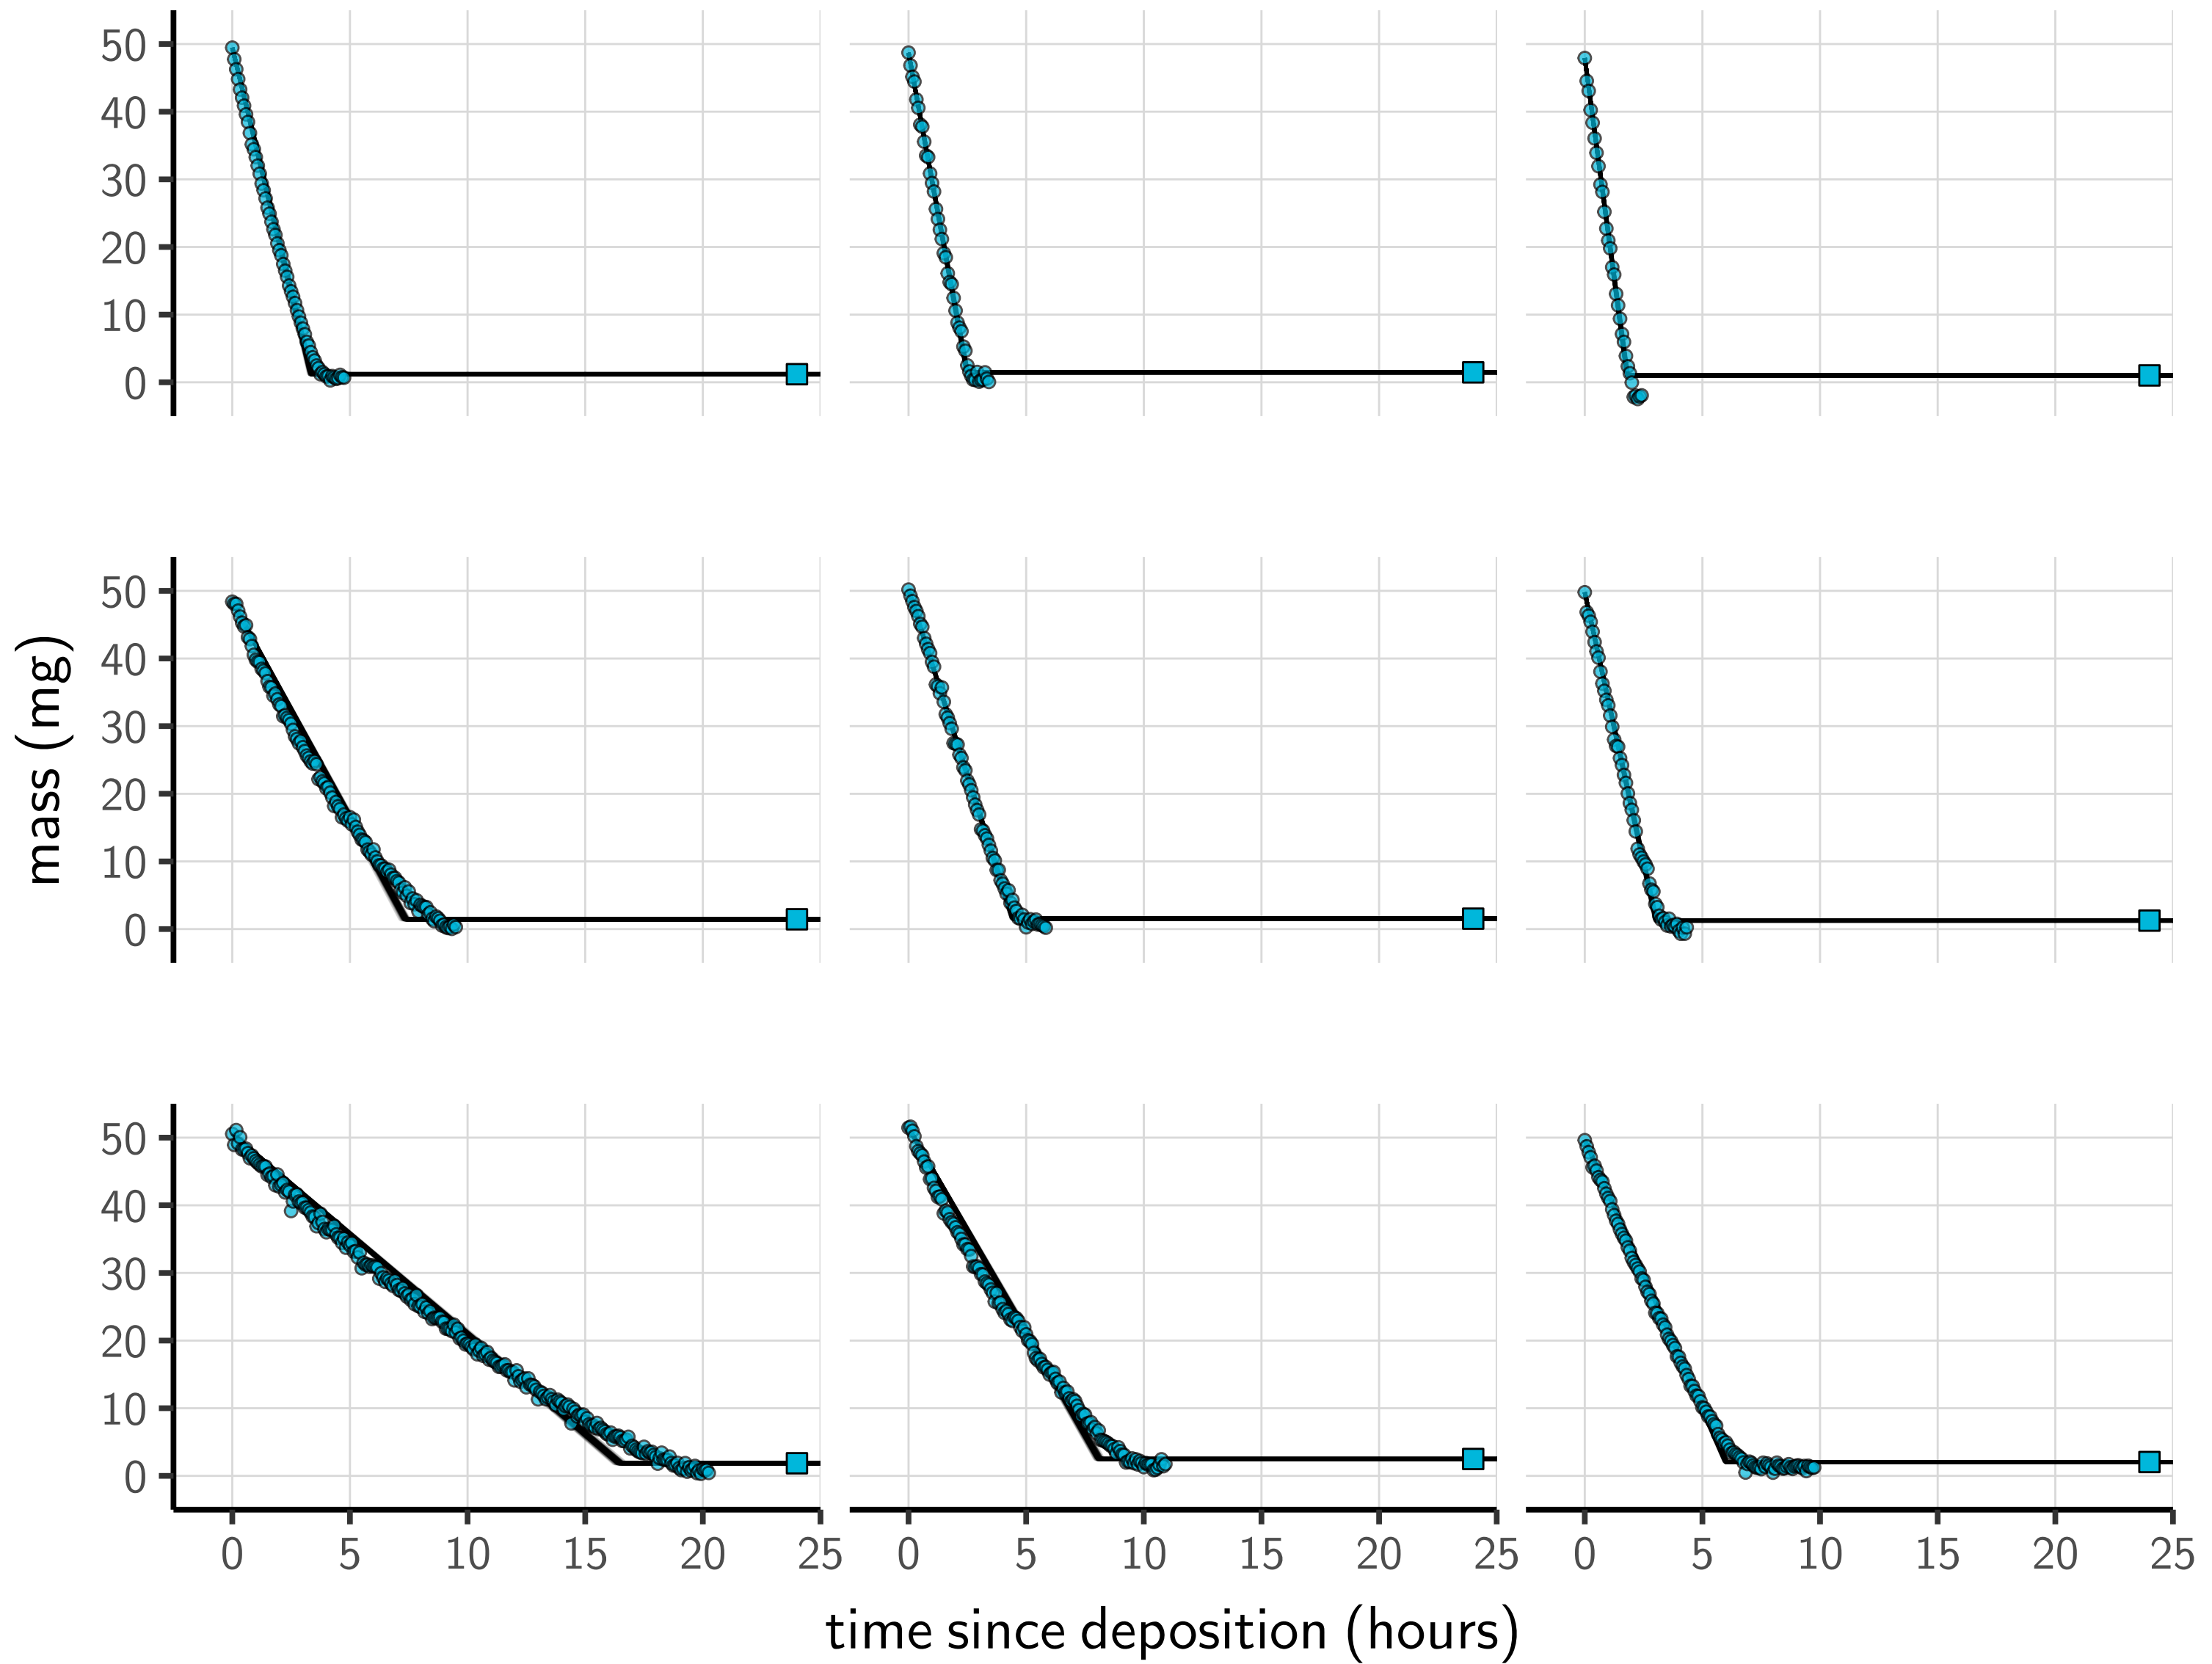

Supplement: supp [file elife-65902-supp-v1.zip › elife_poa_e65902_Figure_1_figure_supplement_1.pdf]

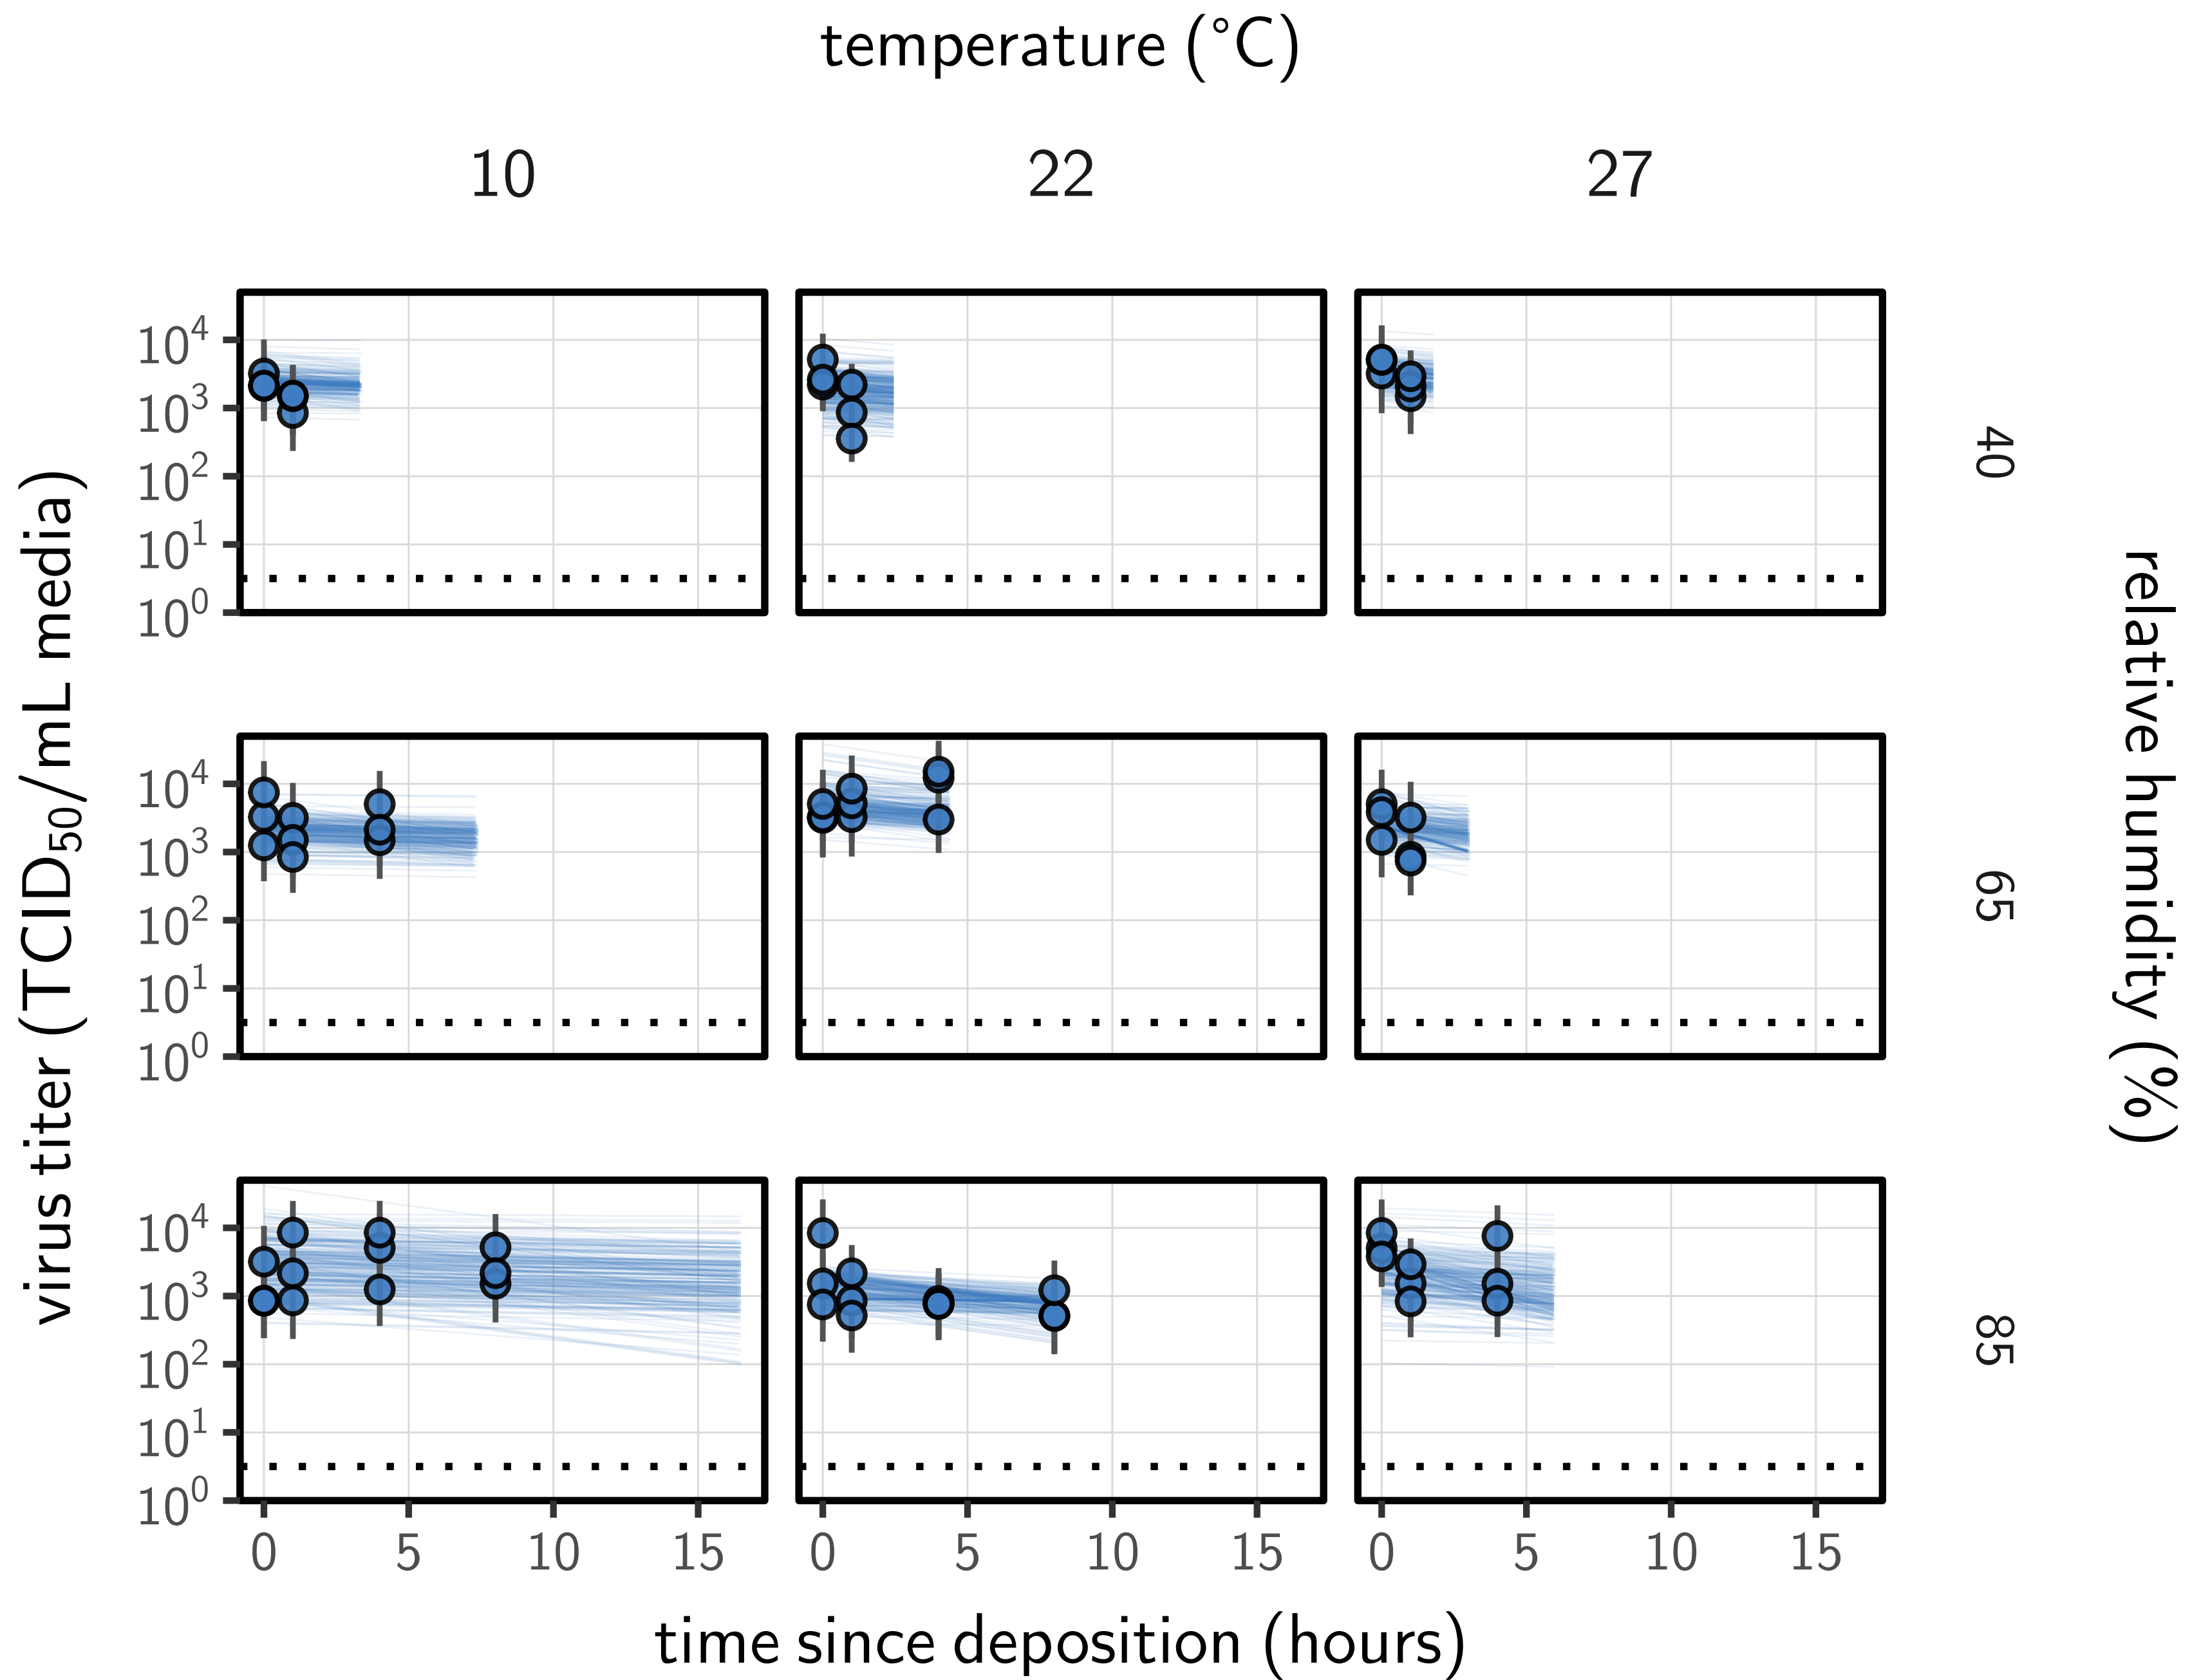

Supplement: supp [file elife-65902-supp-v1.zip › elife_poa_e65902_Figure_1_figure_supplement_2.pdf]

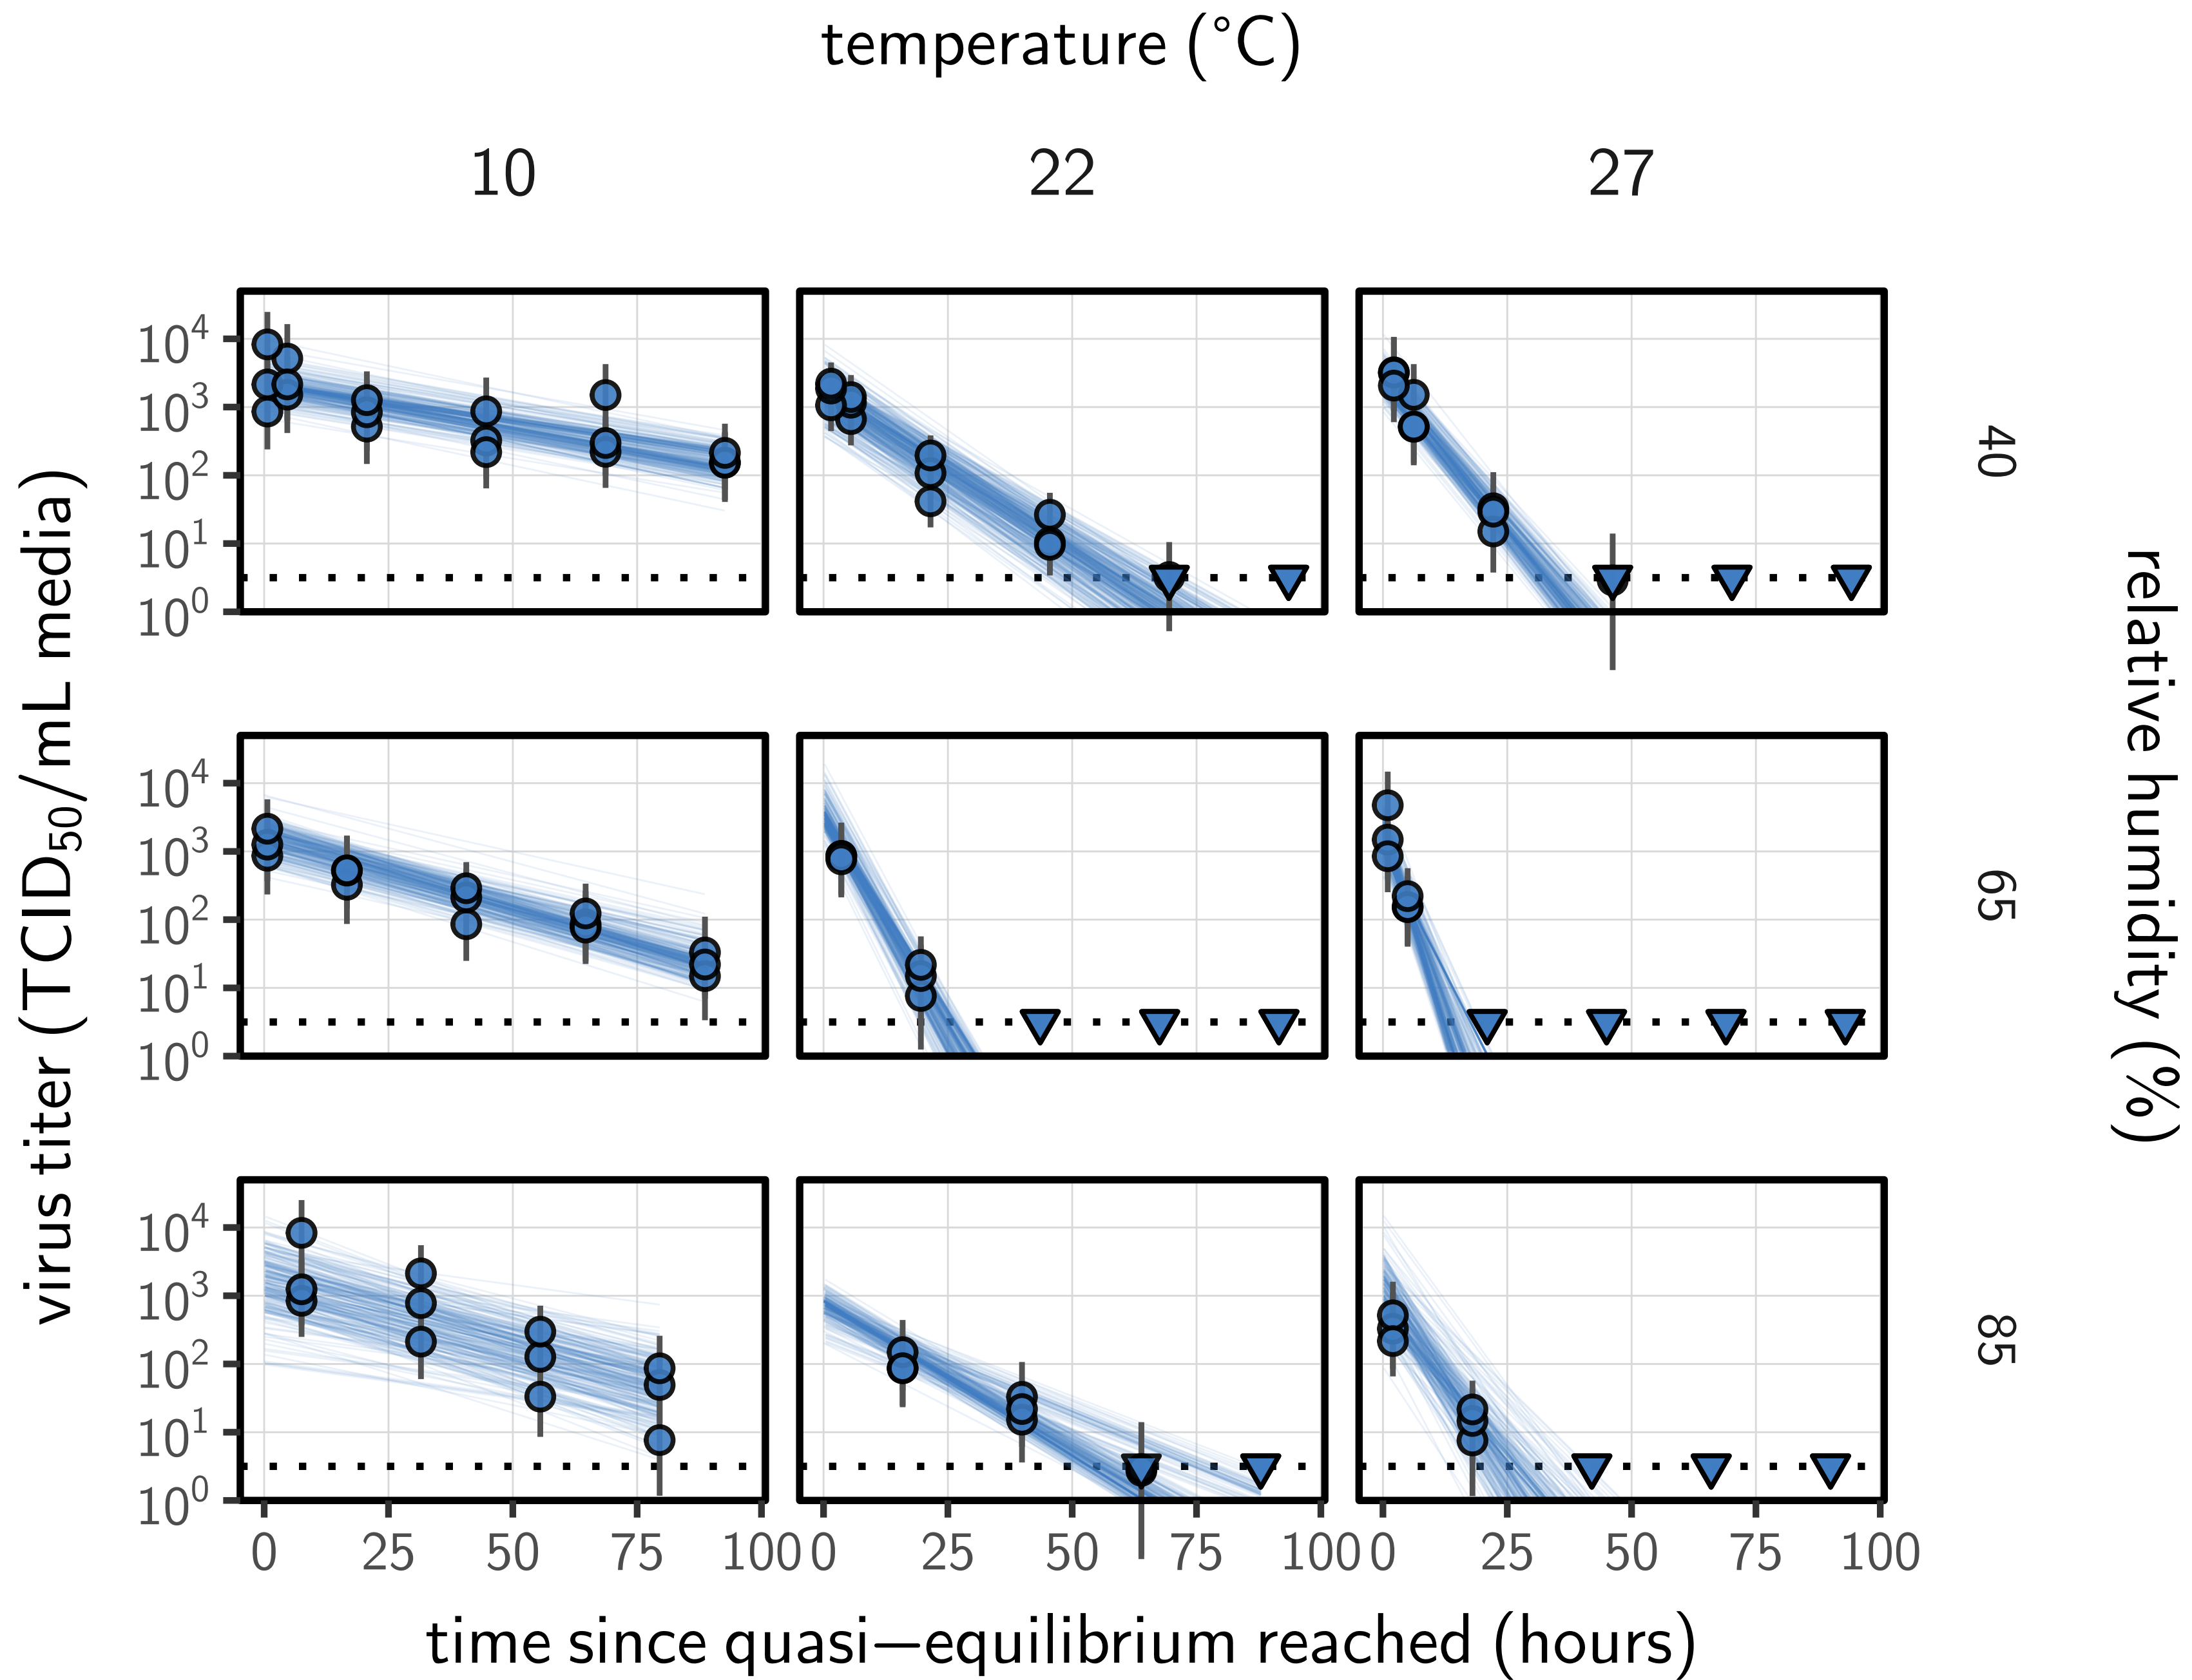

Supplement: supp [file elife-65902-supp-v1.zip › elife_poa_e65902_Figure_1_figure_supplement_3.pdf]

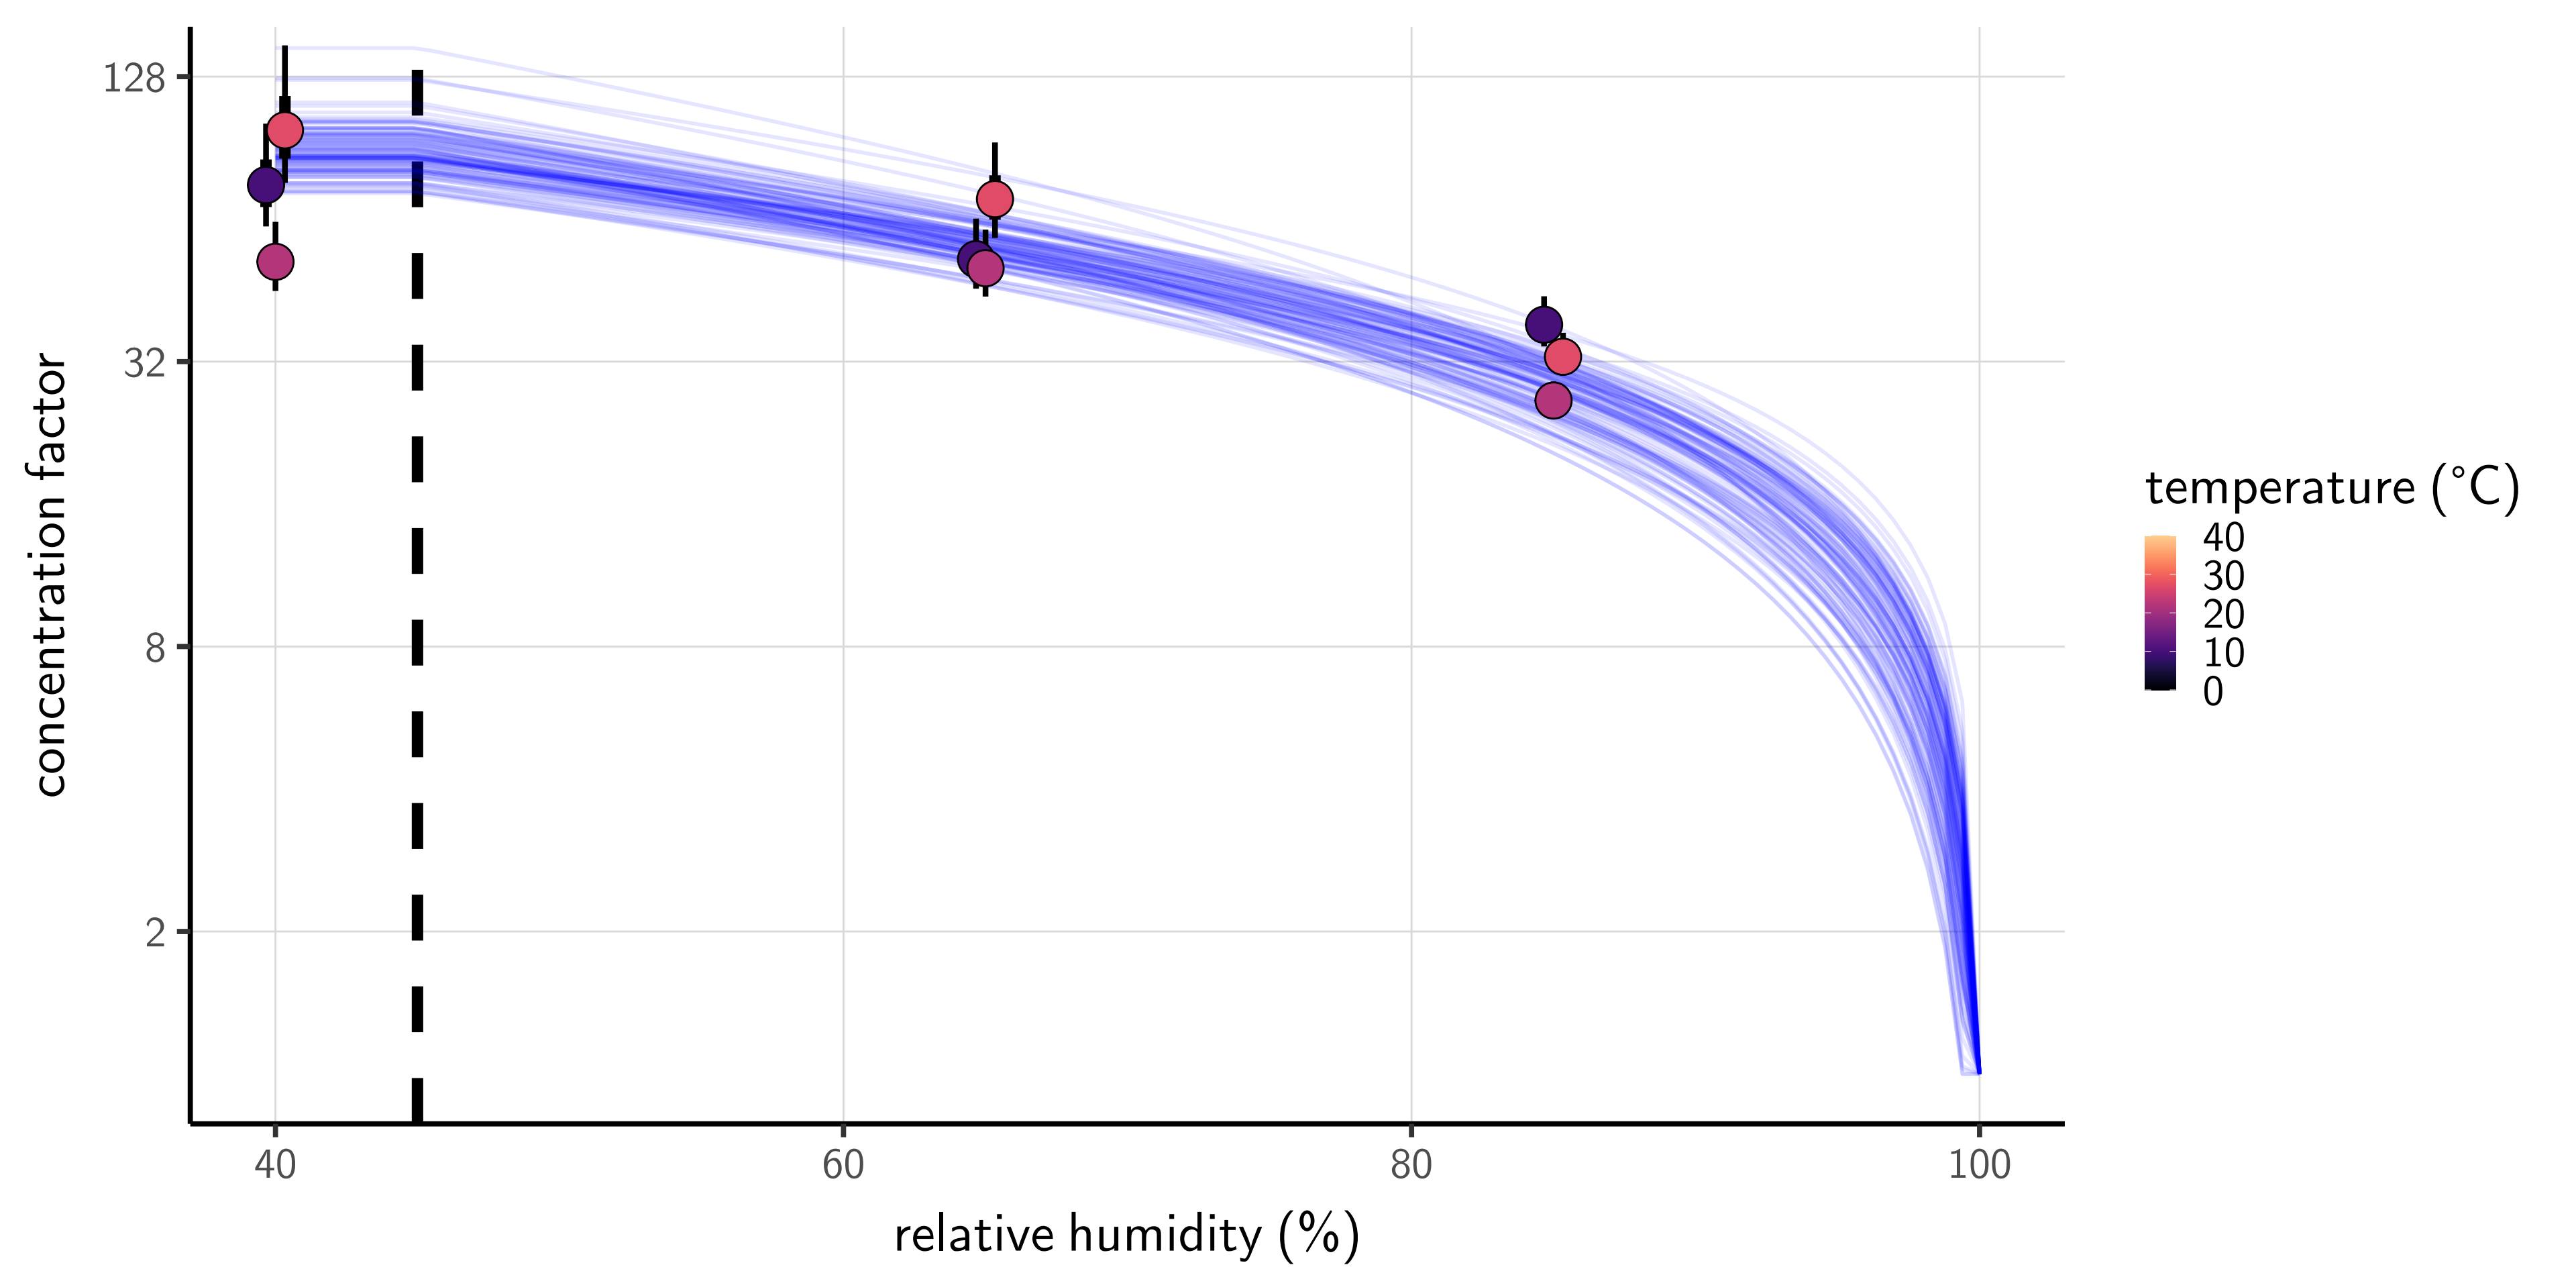

Supplement: supp [file elife-65902-supp-v1.zip › elife_poa_e65902_Figure_2_figure_supplement_1.pdf]

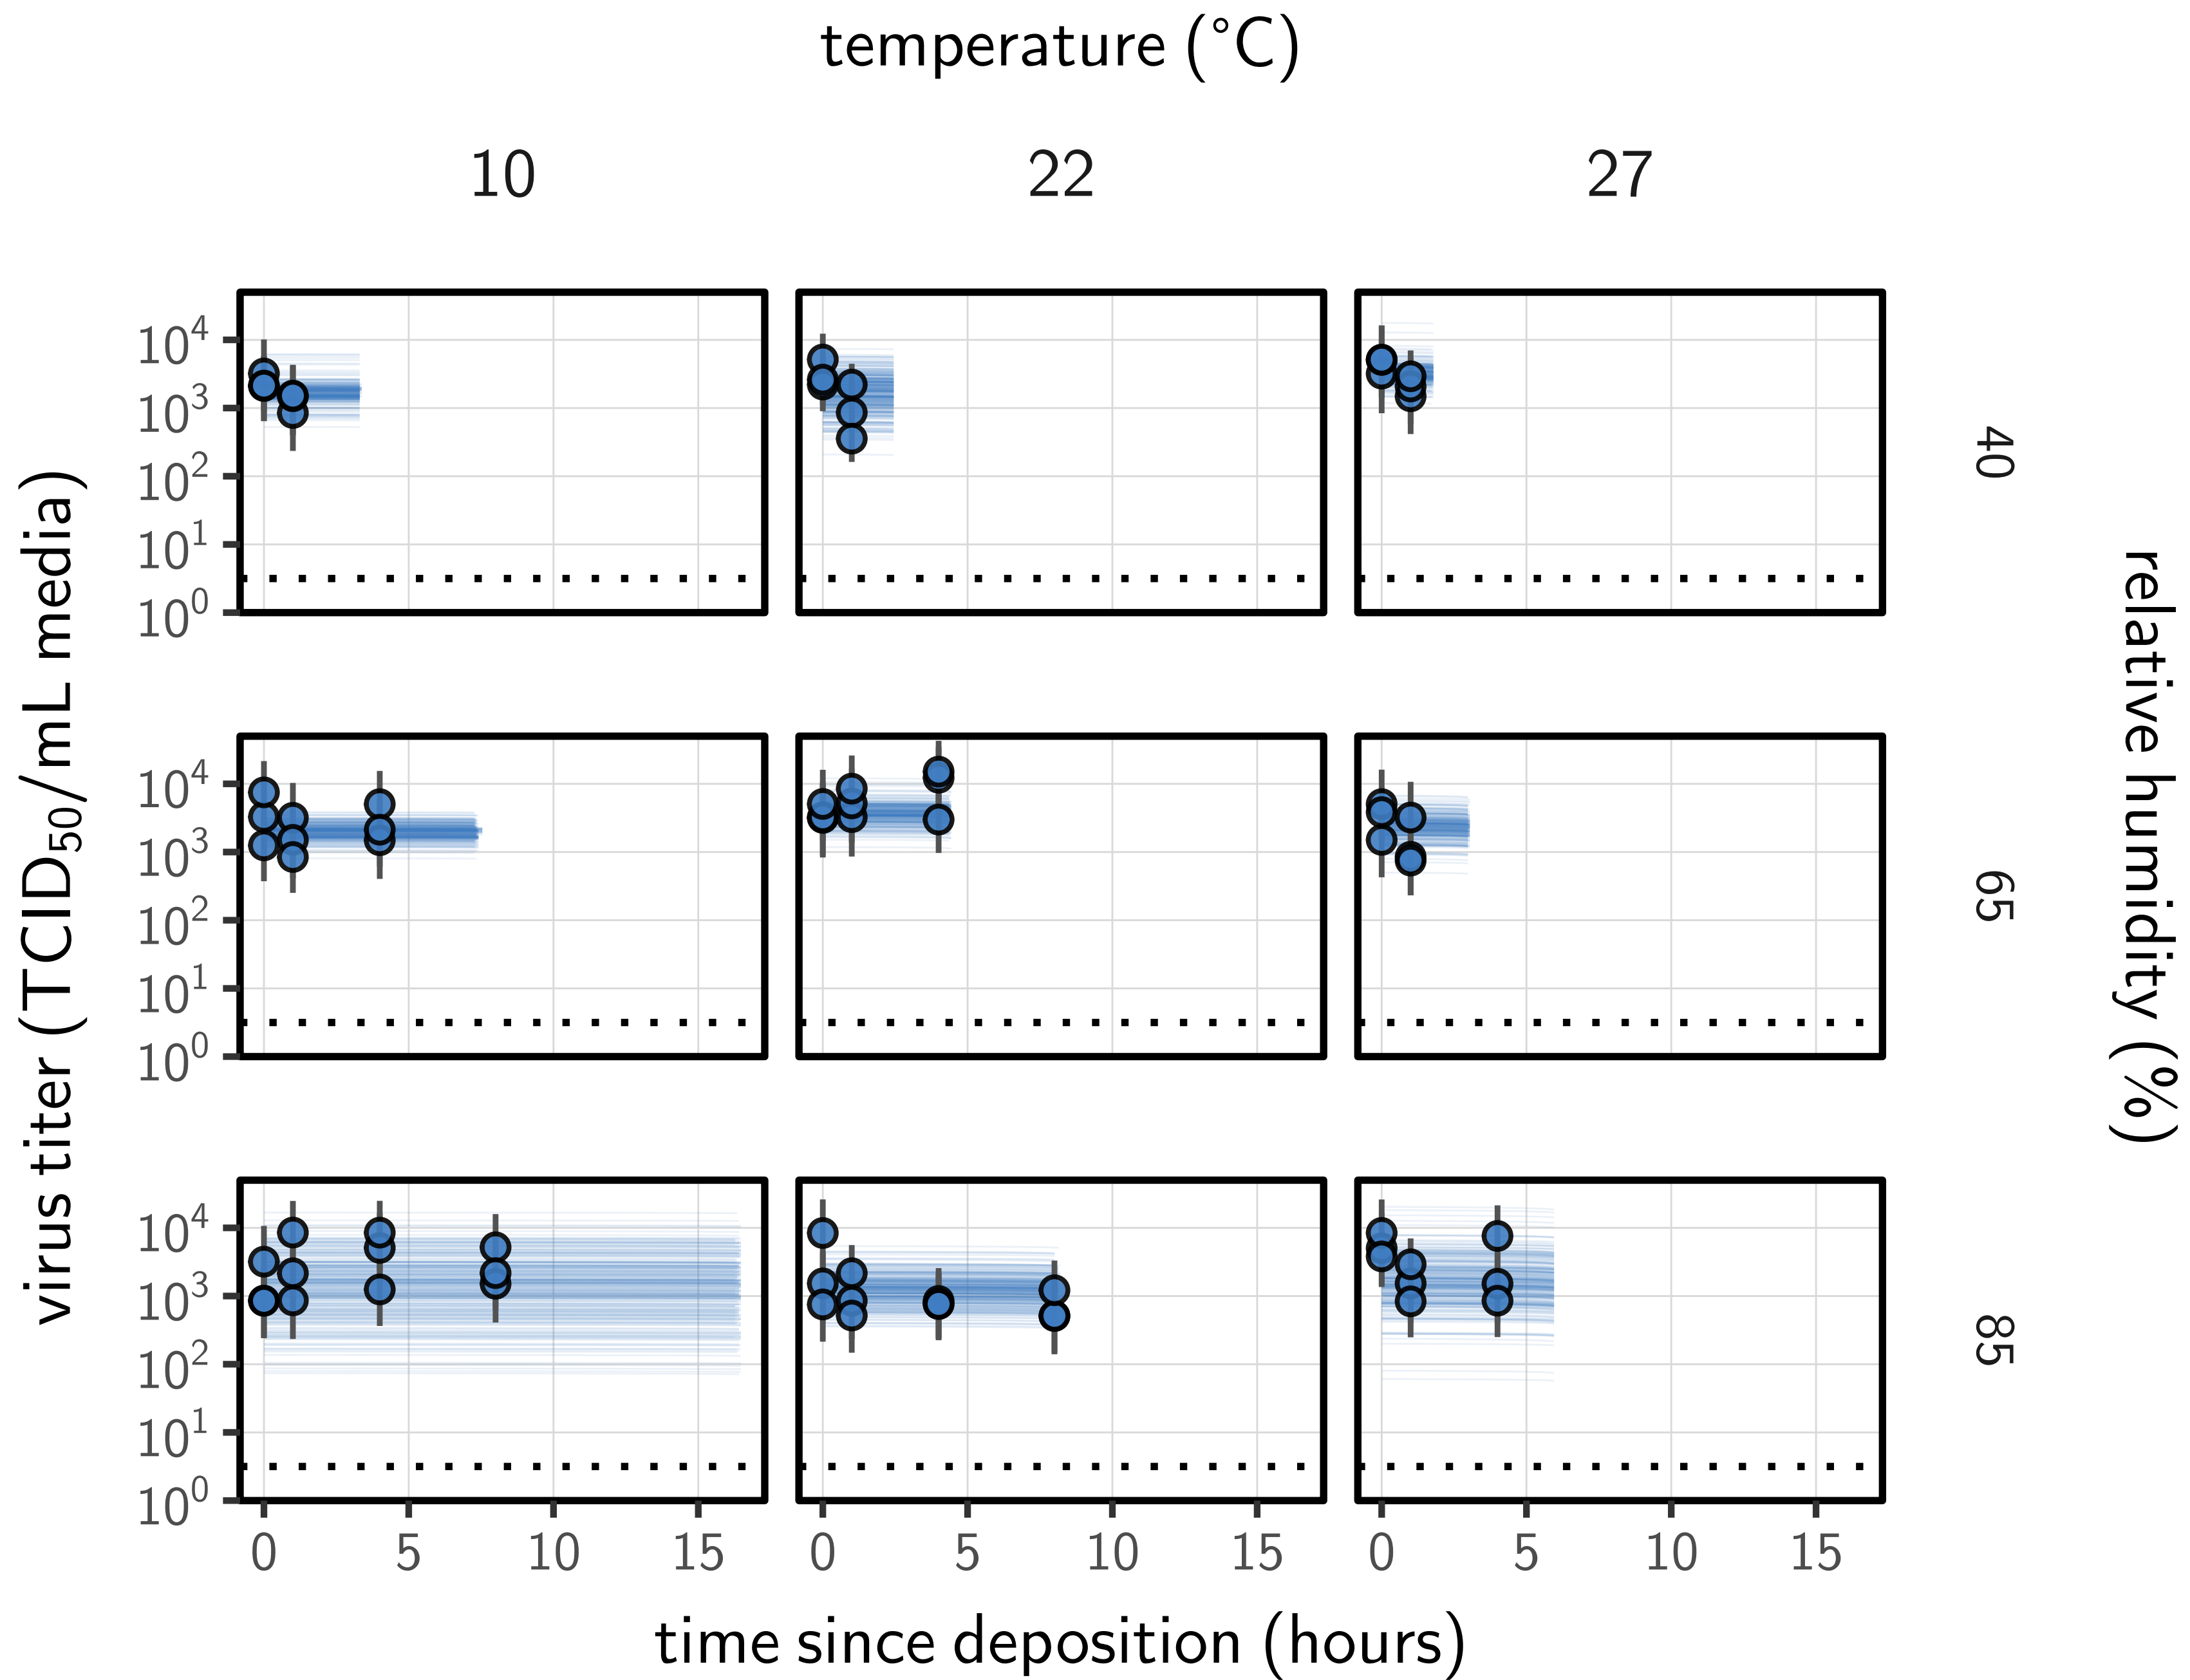

Supplement: supp [file elife-65902-supp-v1.zip › elife_poa_e65902_Figure_2_figure_supplement_2.pdf]

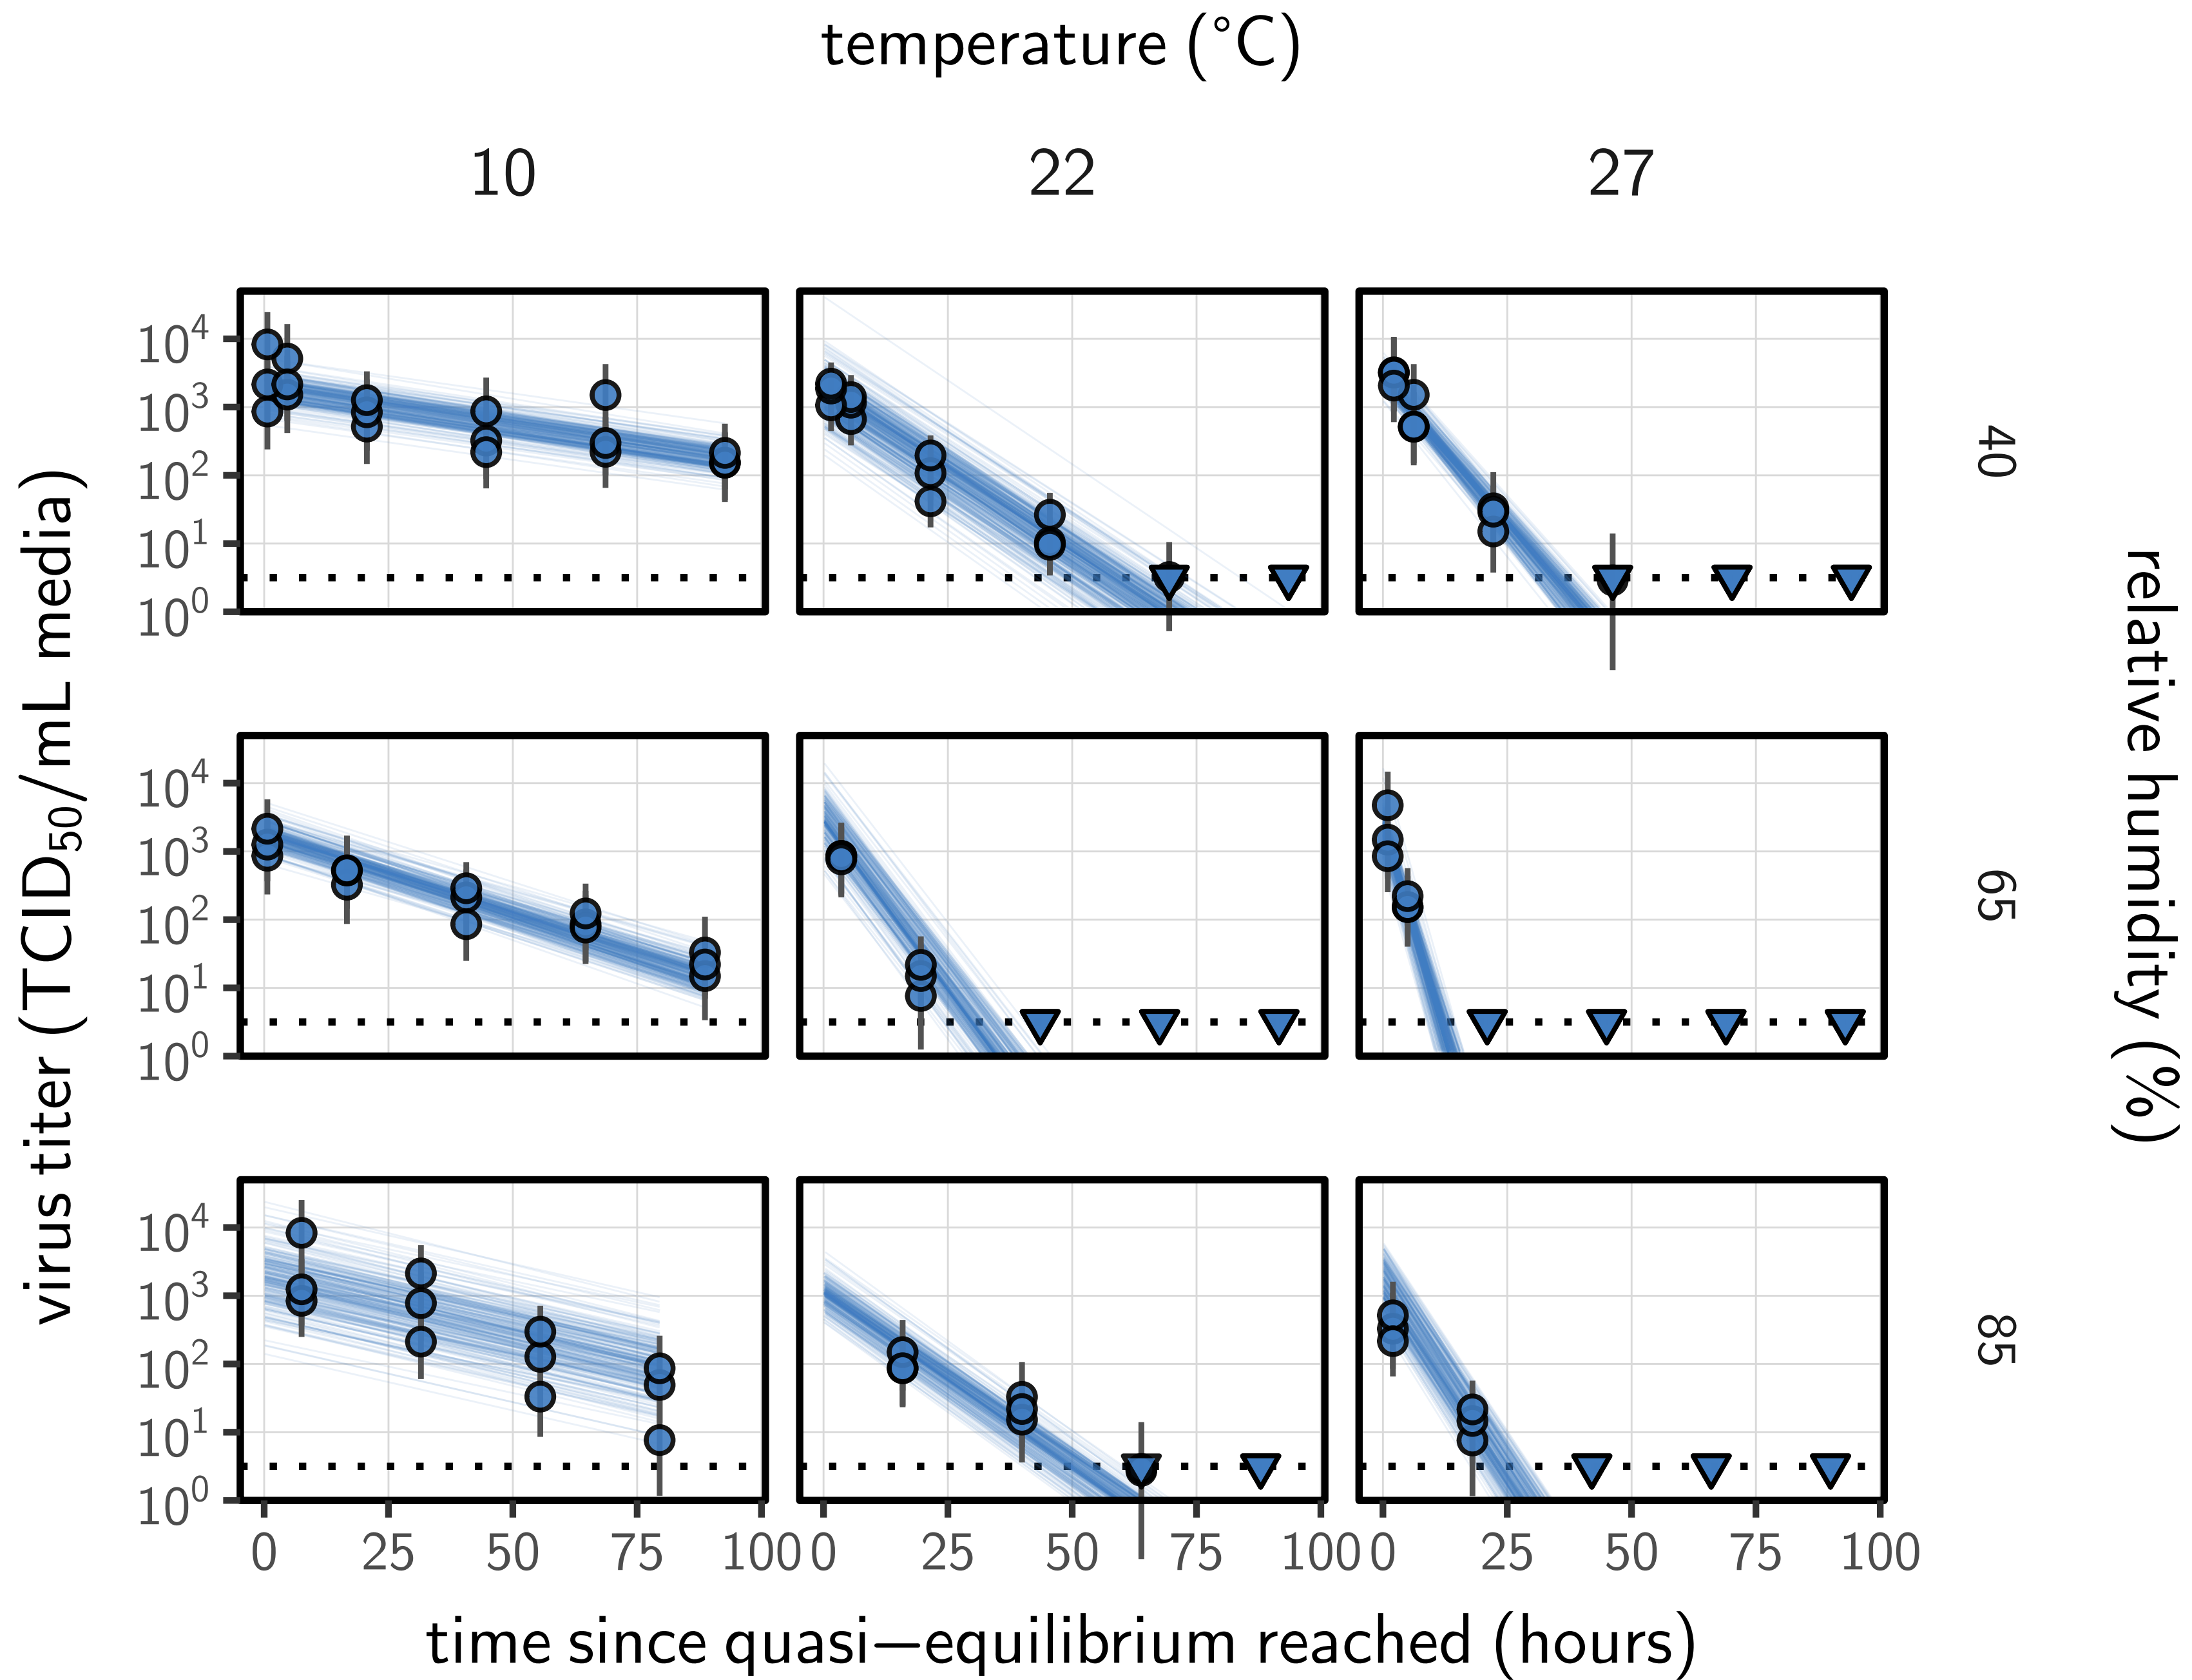

Supplement: supp [file elife-65902-supp-v1.zip › elife_poa_e65902_Figure_2_figure_supplement_3.pdf]

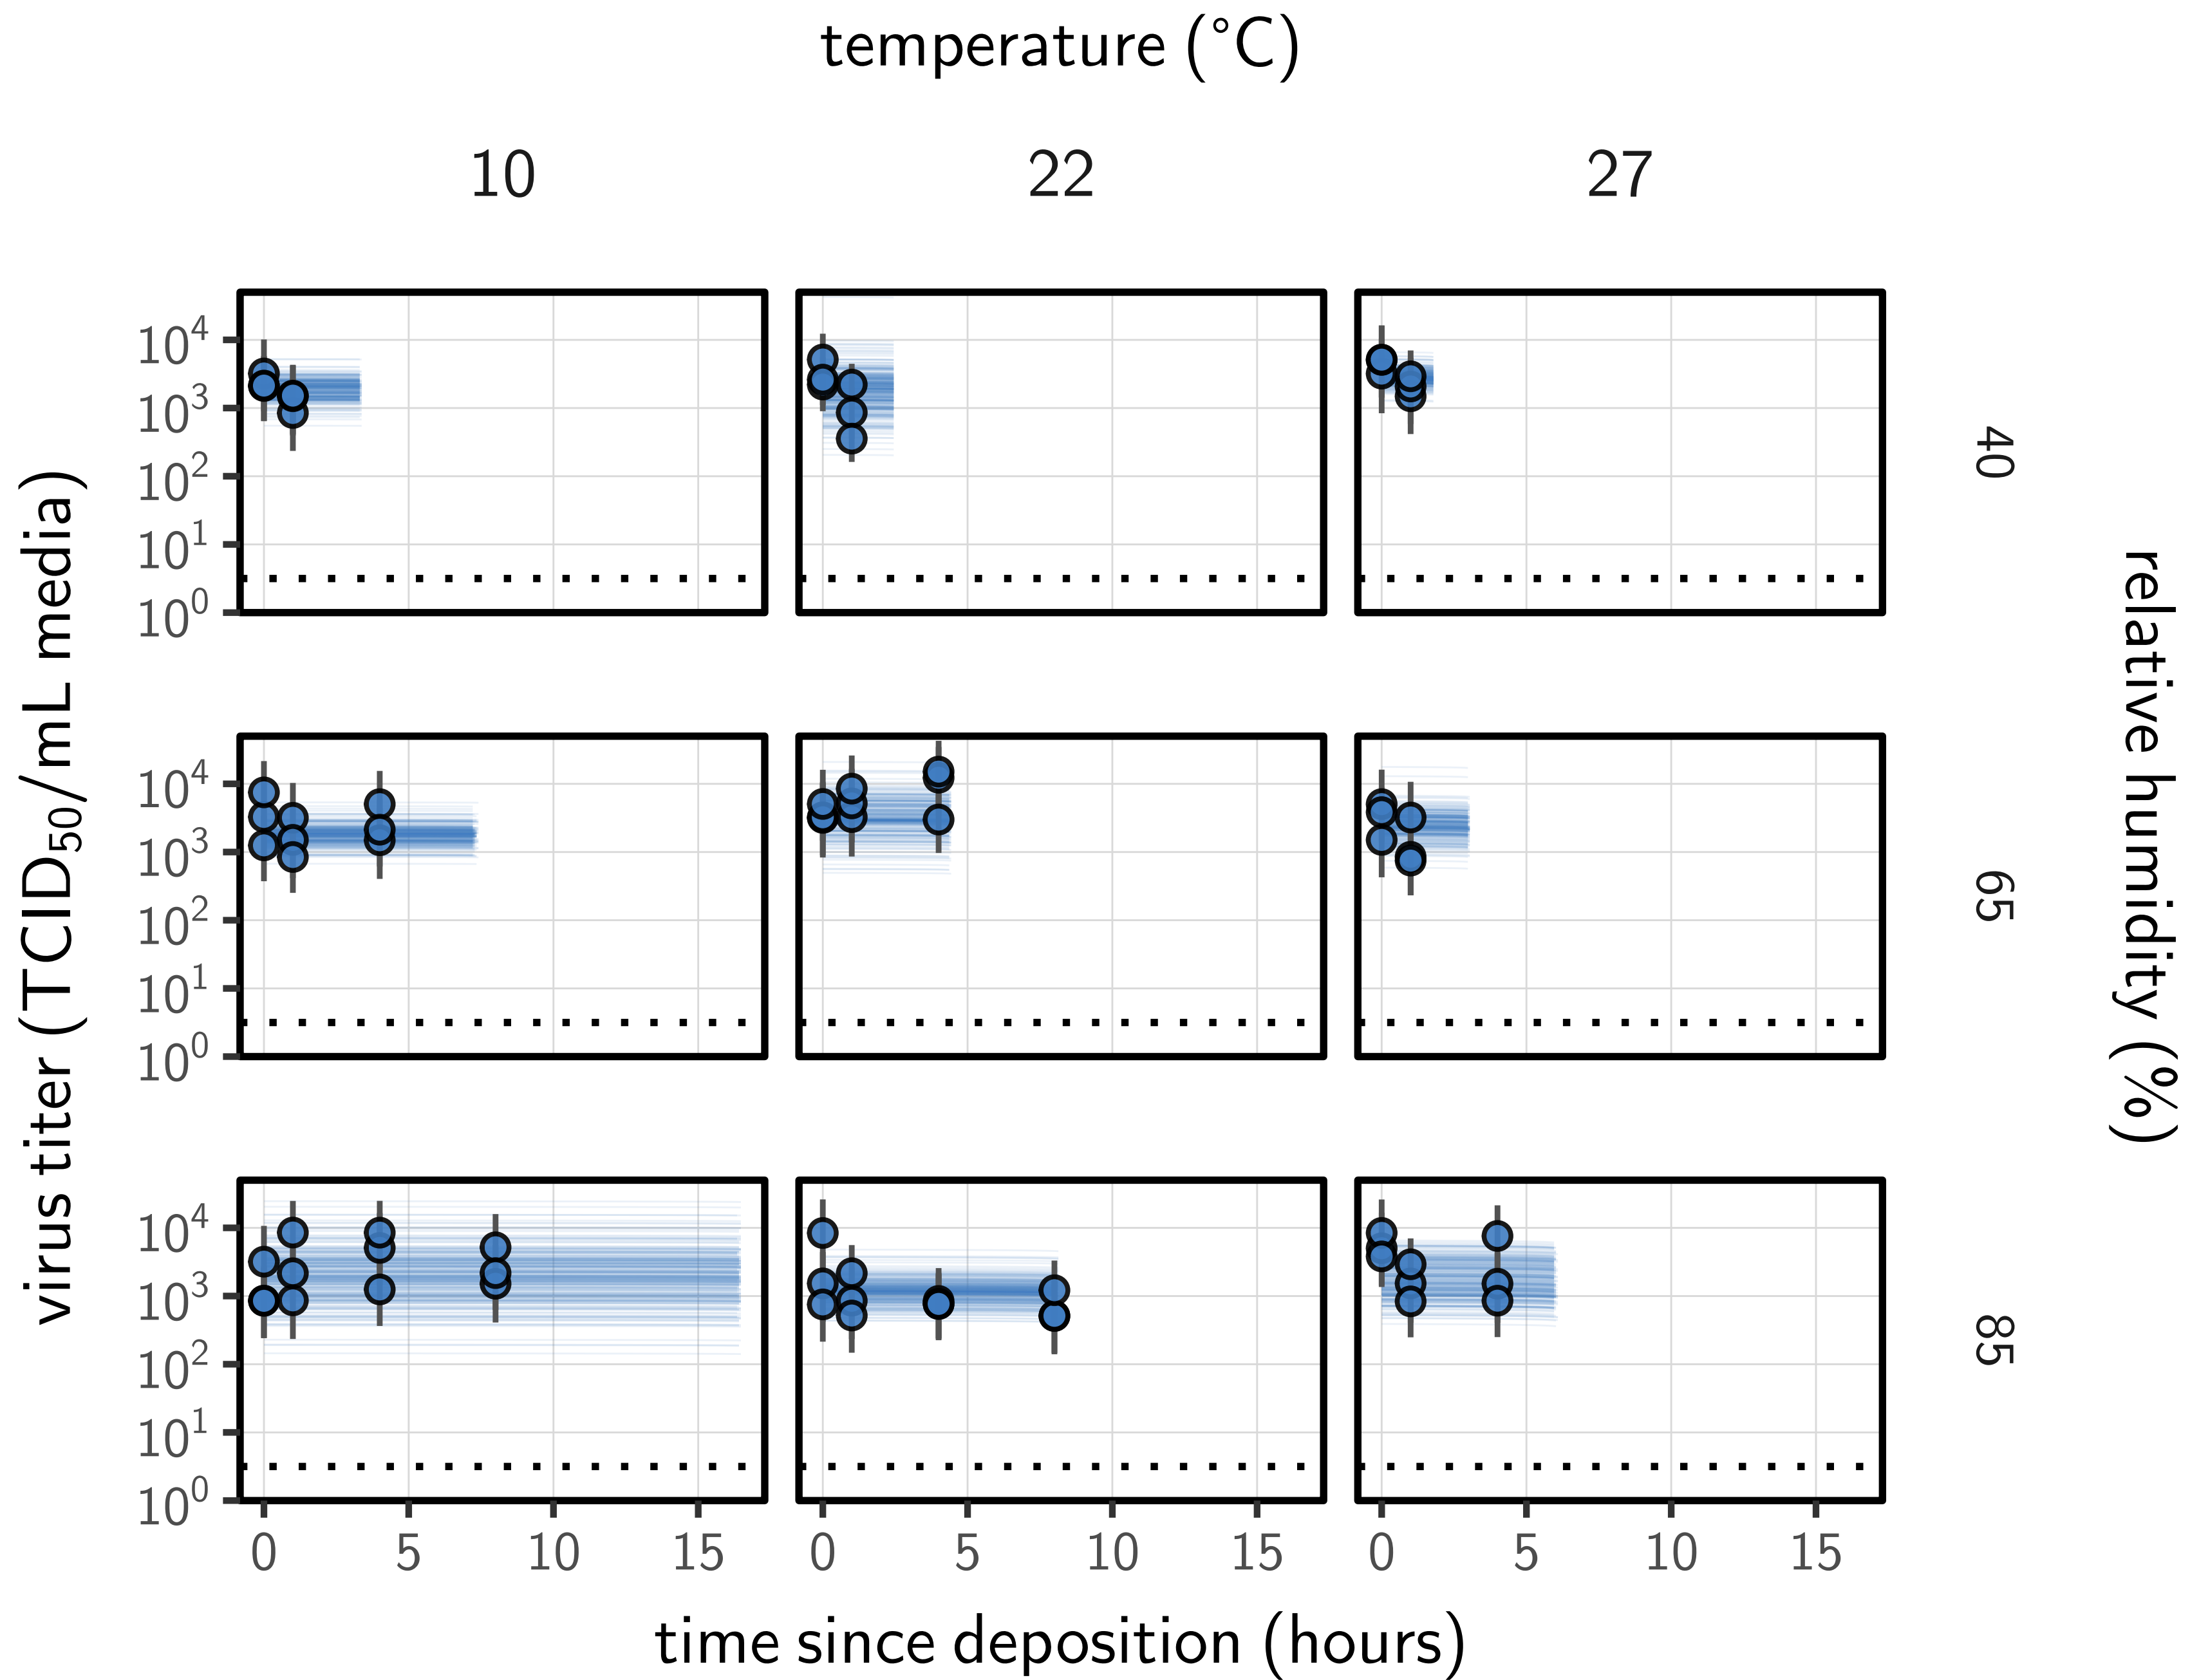

Supplement: supp [file elife-65902-supp-v1.zip › elife_poa_e65902_Figure_2_figure_supplement_4.pdf]

Direct estimate

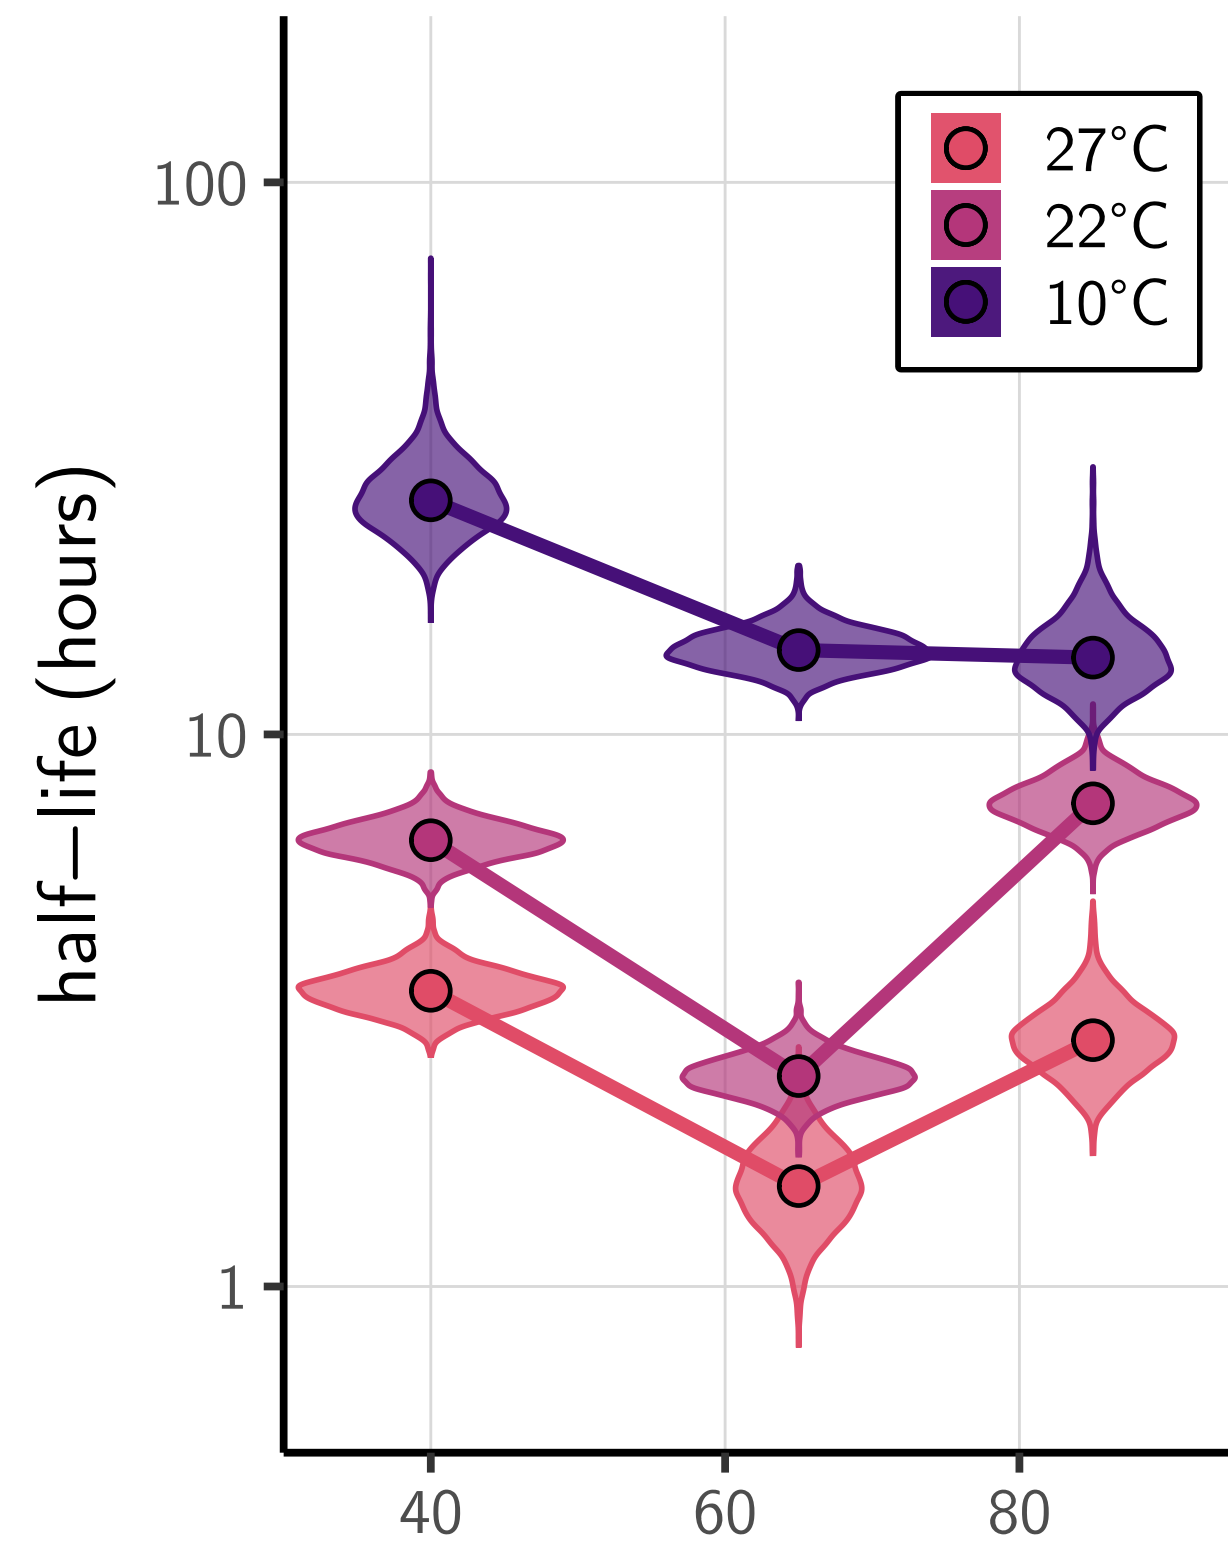

Main mechanistic model

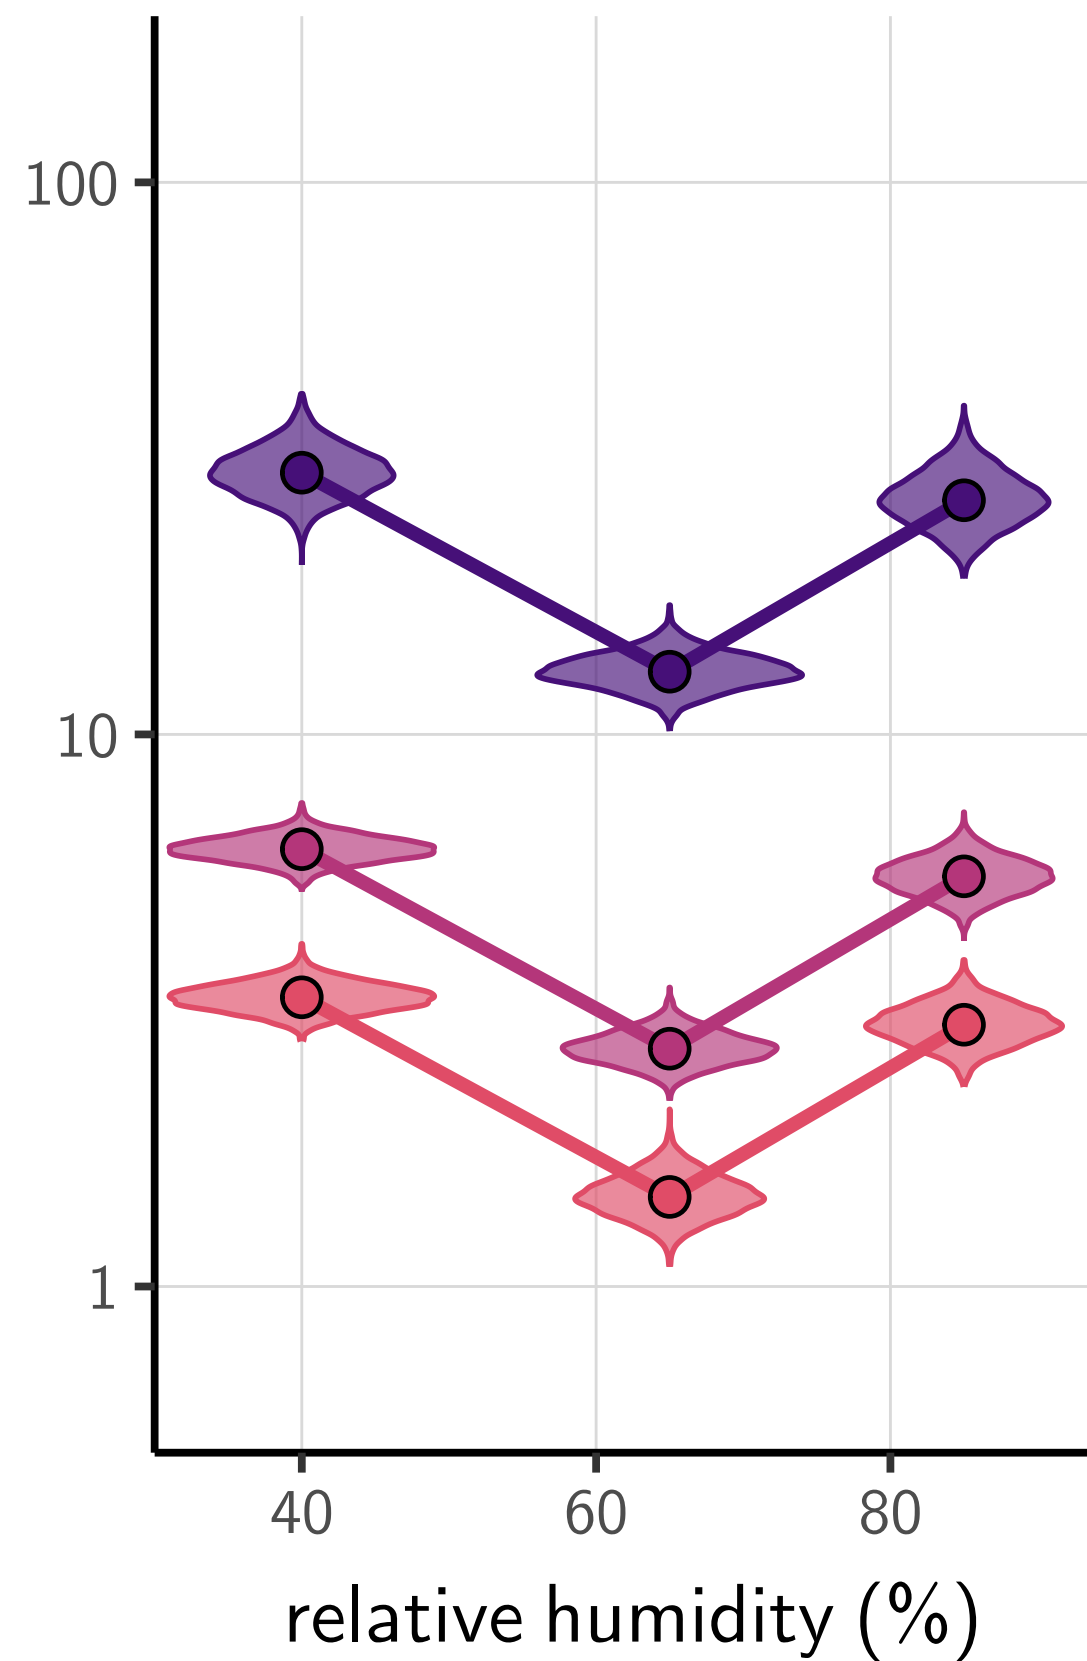

Model with directly—  
measured concentration

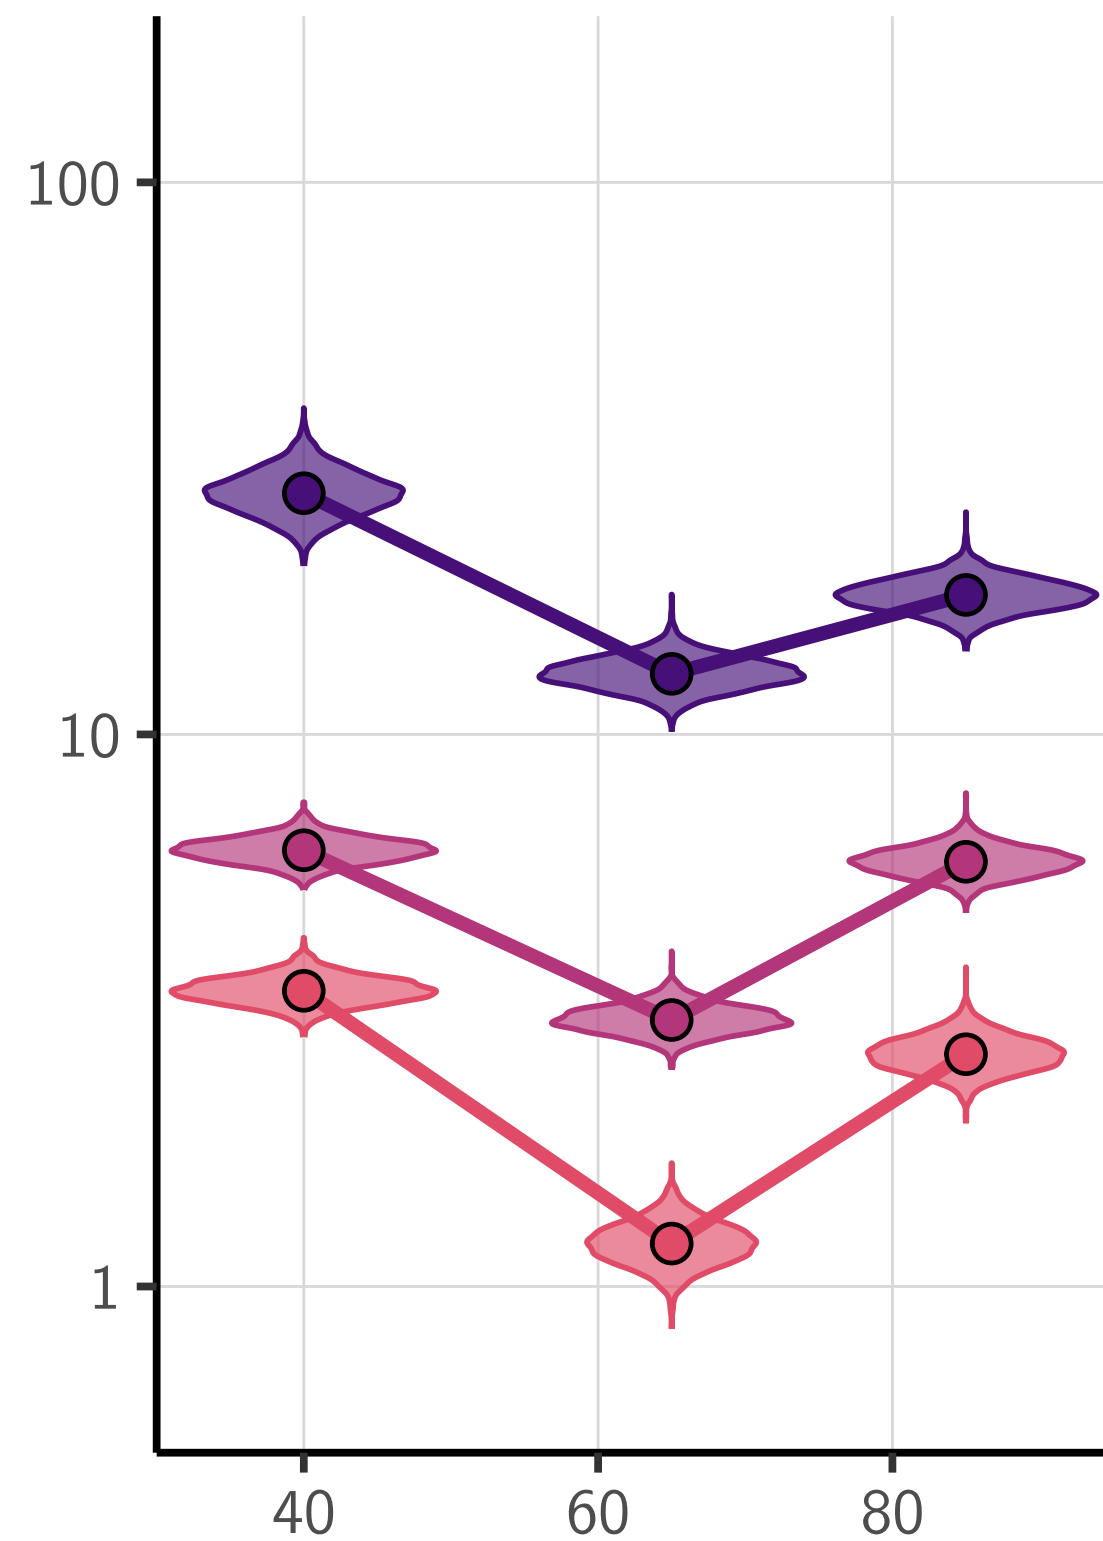

Supplement: supp [file elife-65902-supp-v1.zip › elife_poa_e65902_Figure_2_figure_supplement_5.pdf]

Main model

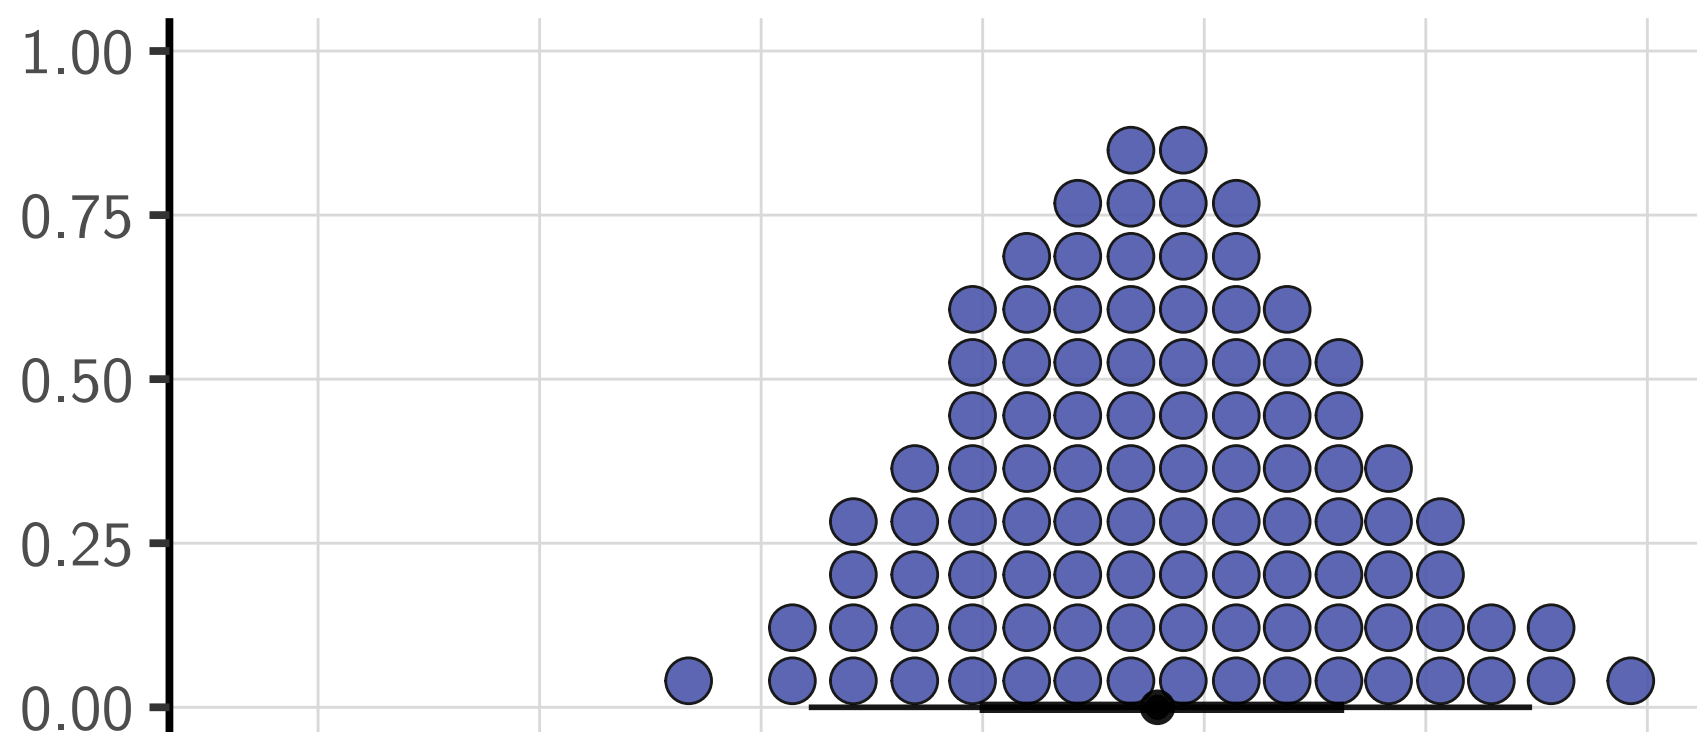

Directly—measured concentration

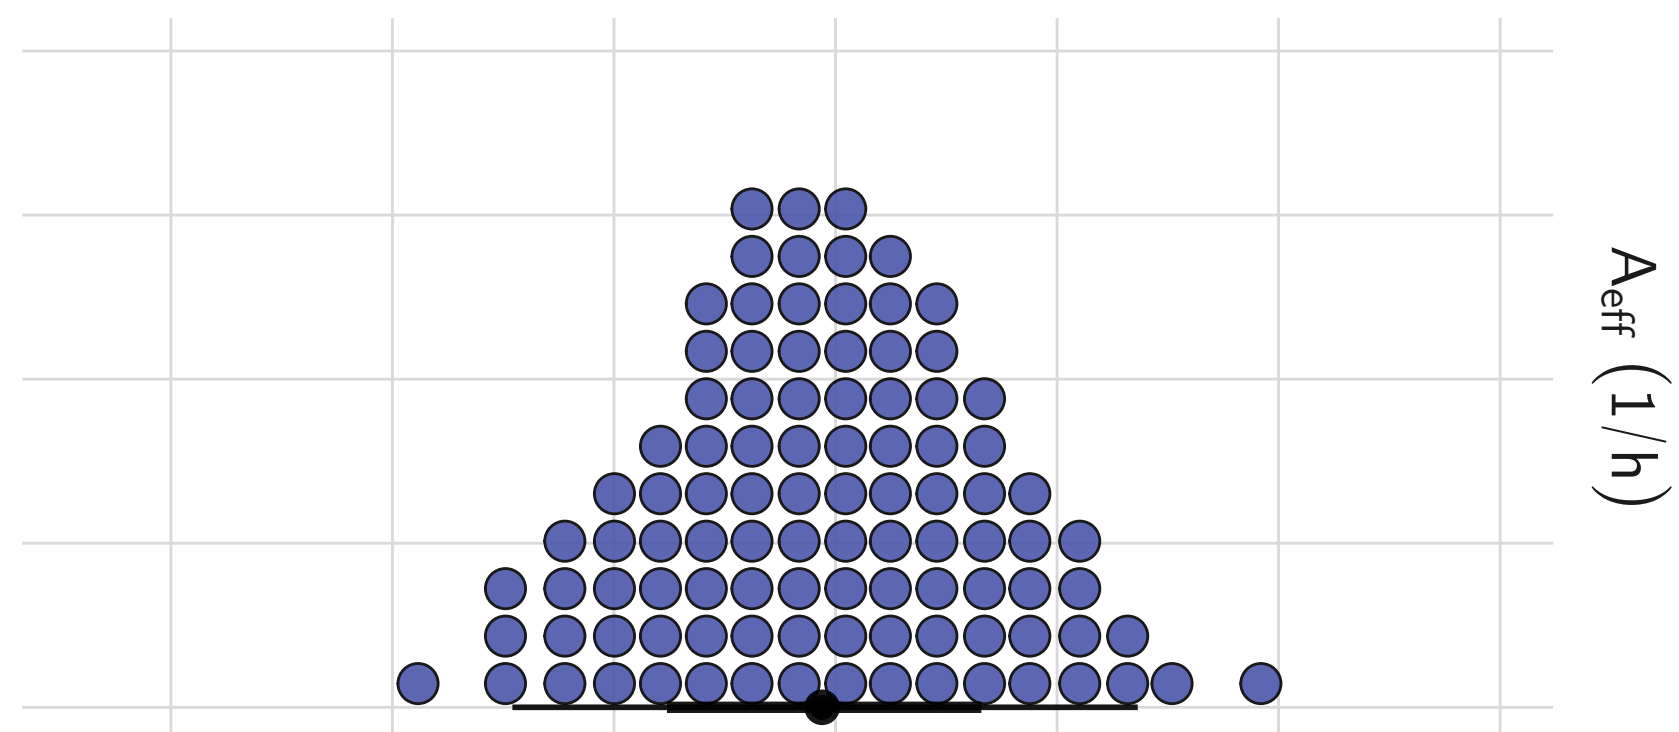 $A_{\text{eff}}$  (1/h)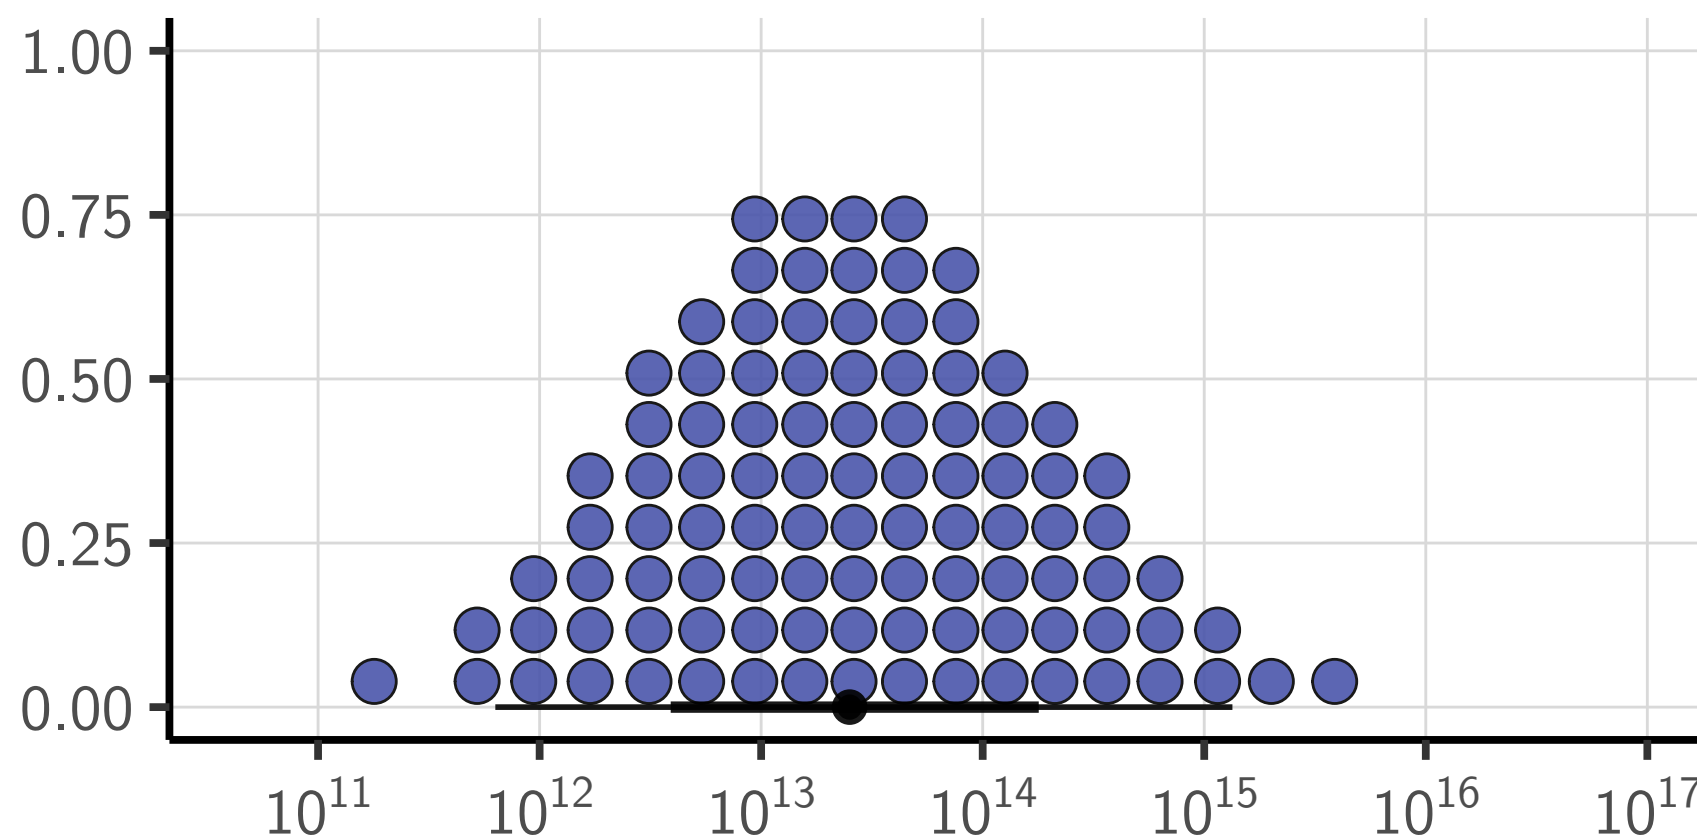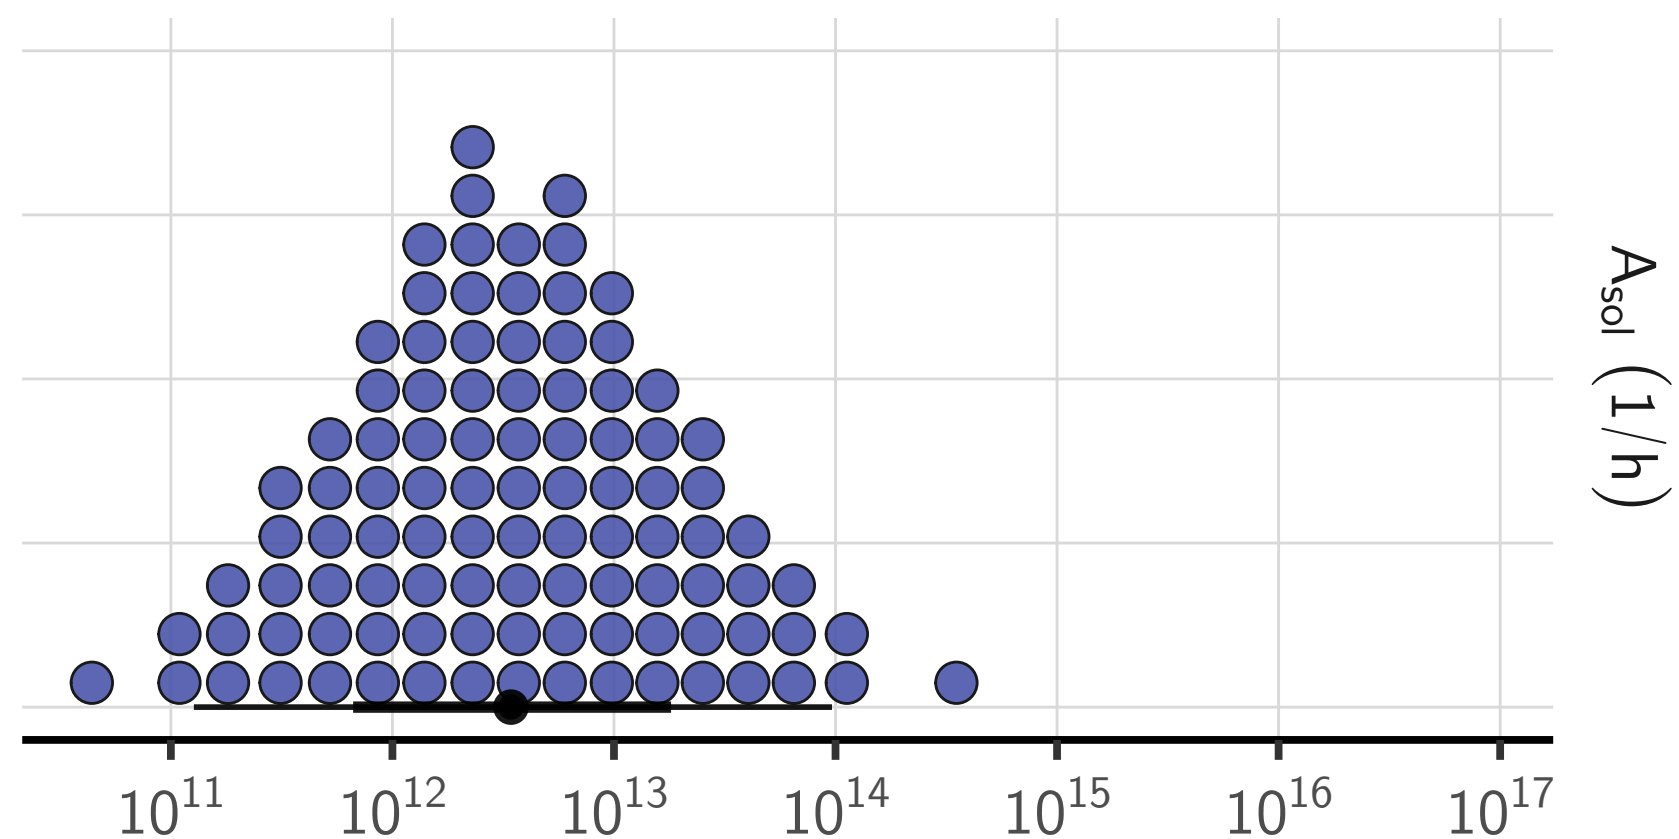 $A_{\text{sol}}$  (1/h)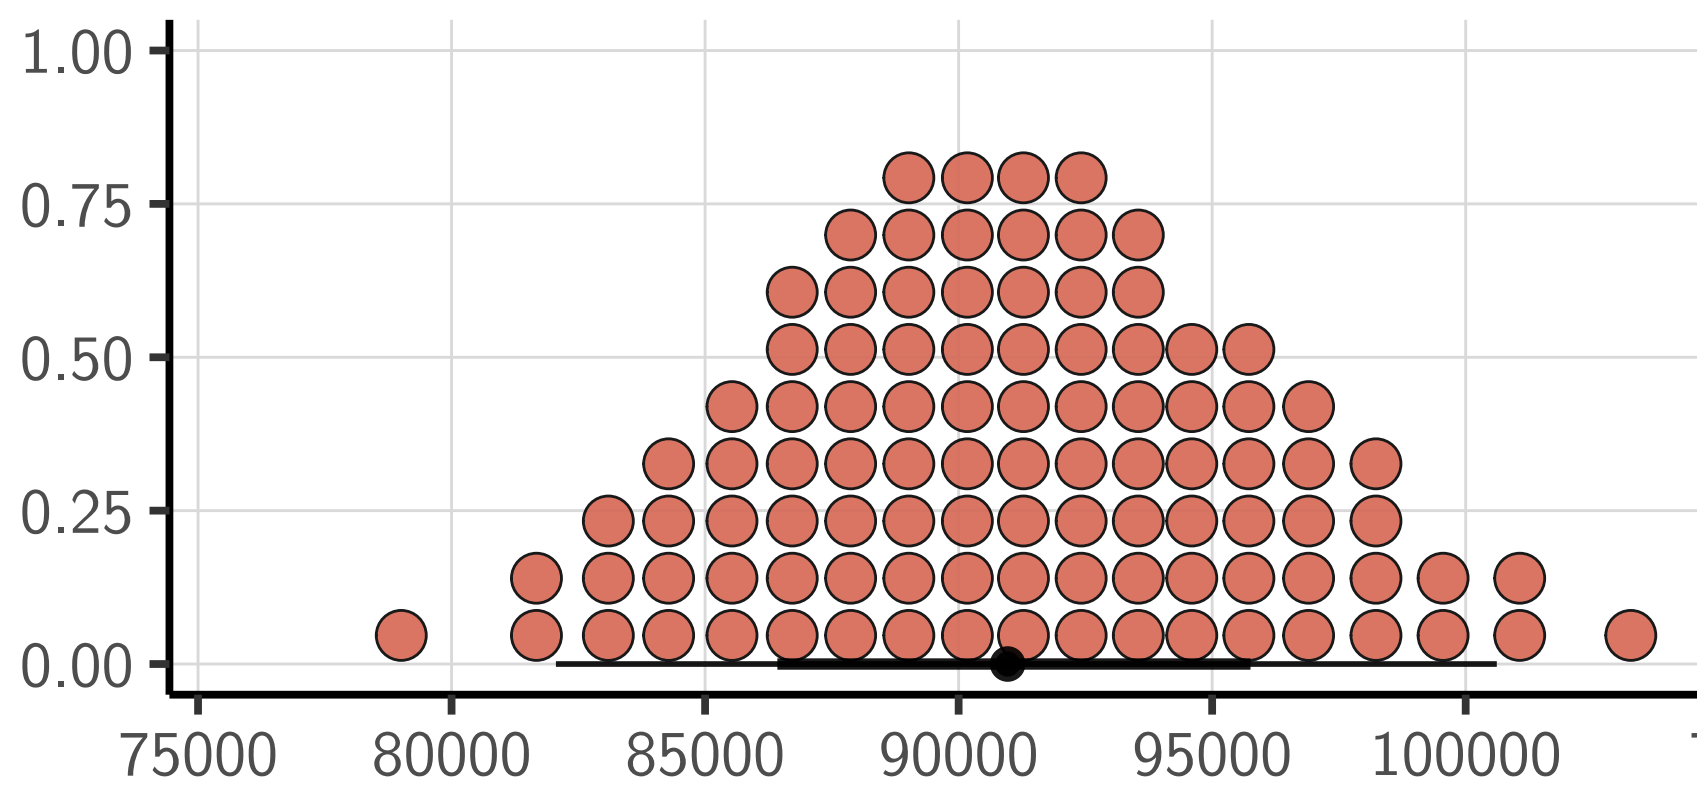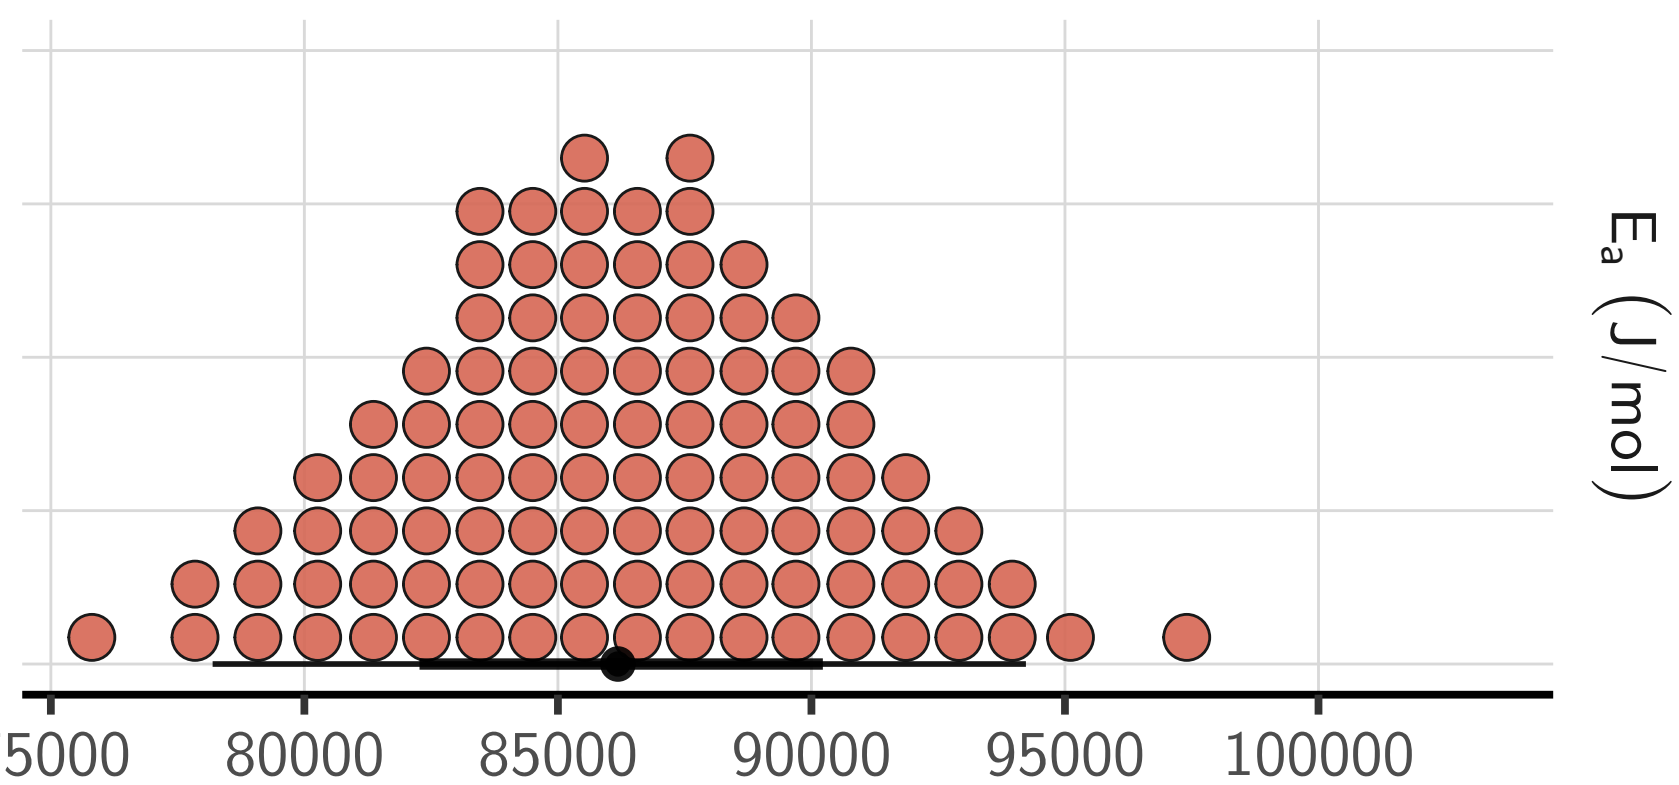 $E_a$  (J/mol)

parameter value

Supplement: supp [file elife-65902-supp-v1.zip › elife_poa_e65902_Figure_2_figure_supplement_6.pdf]

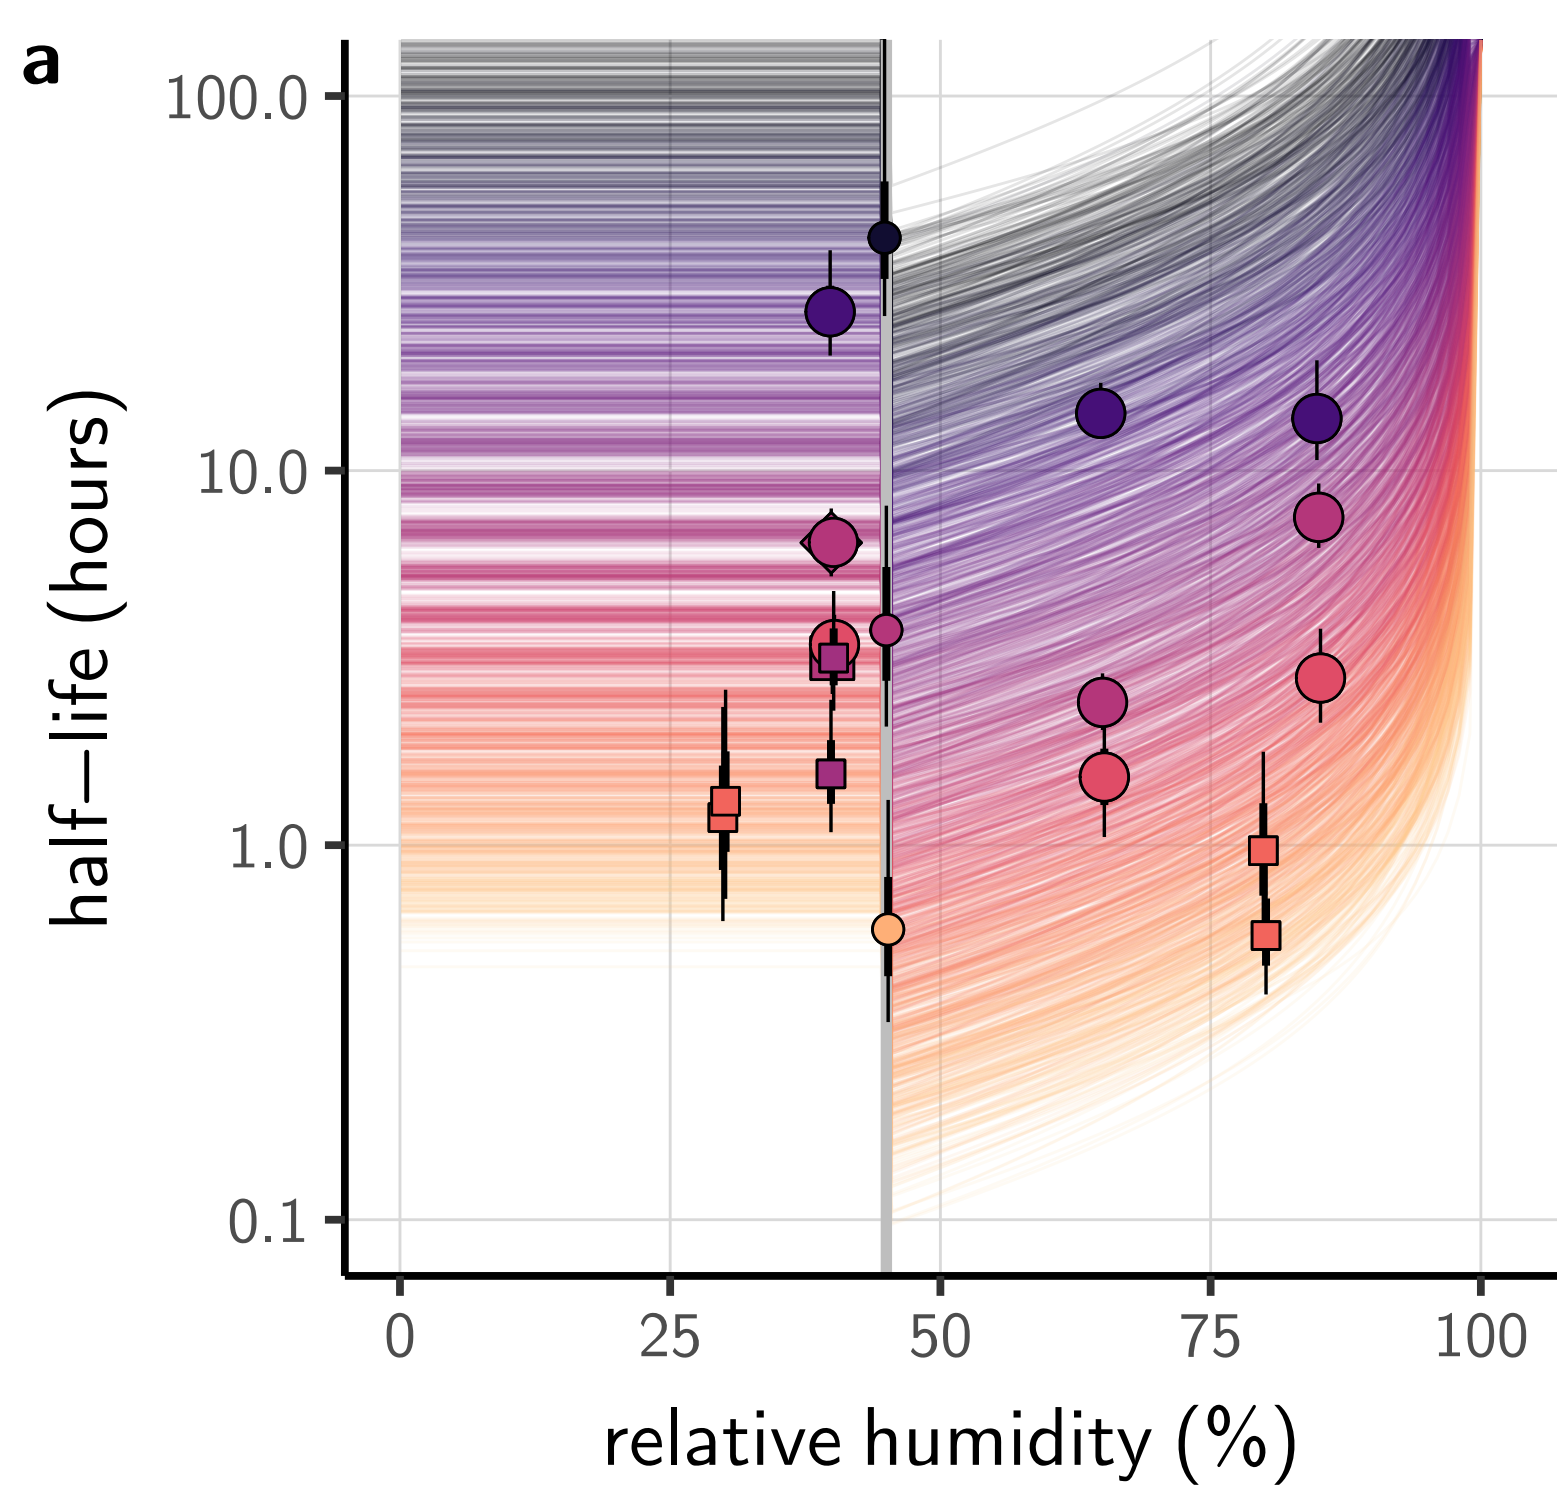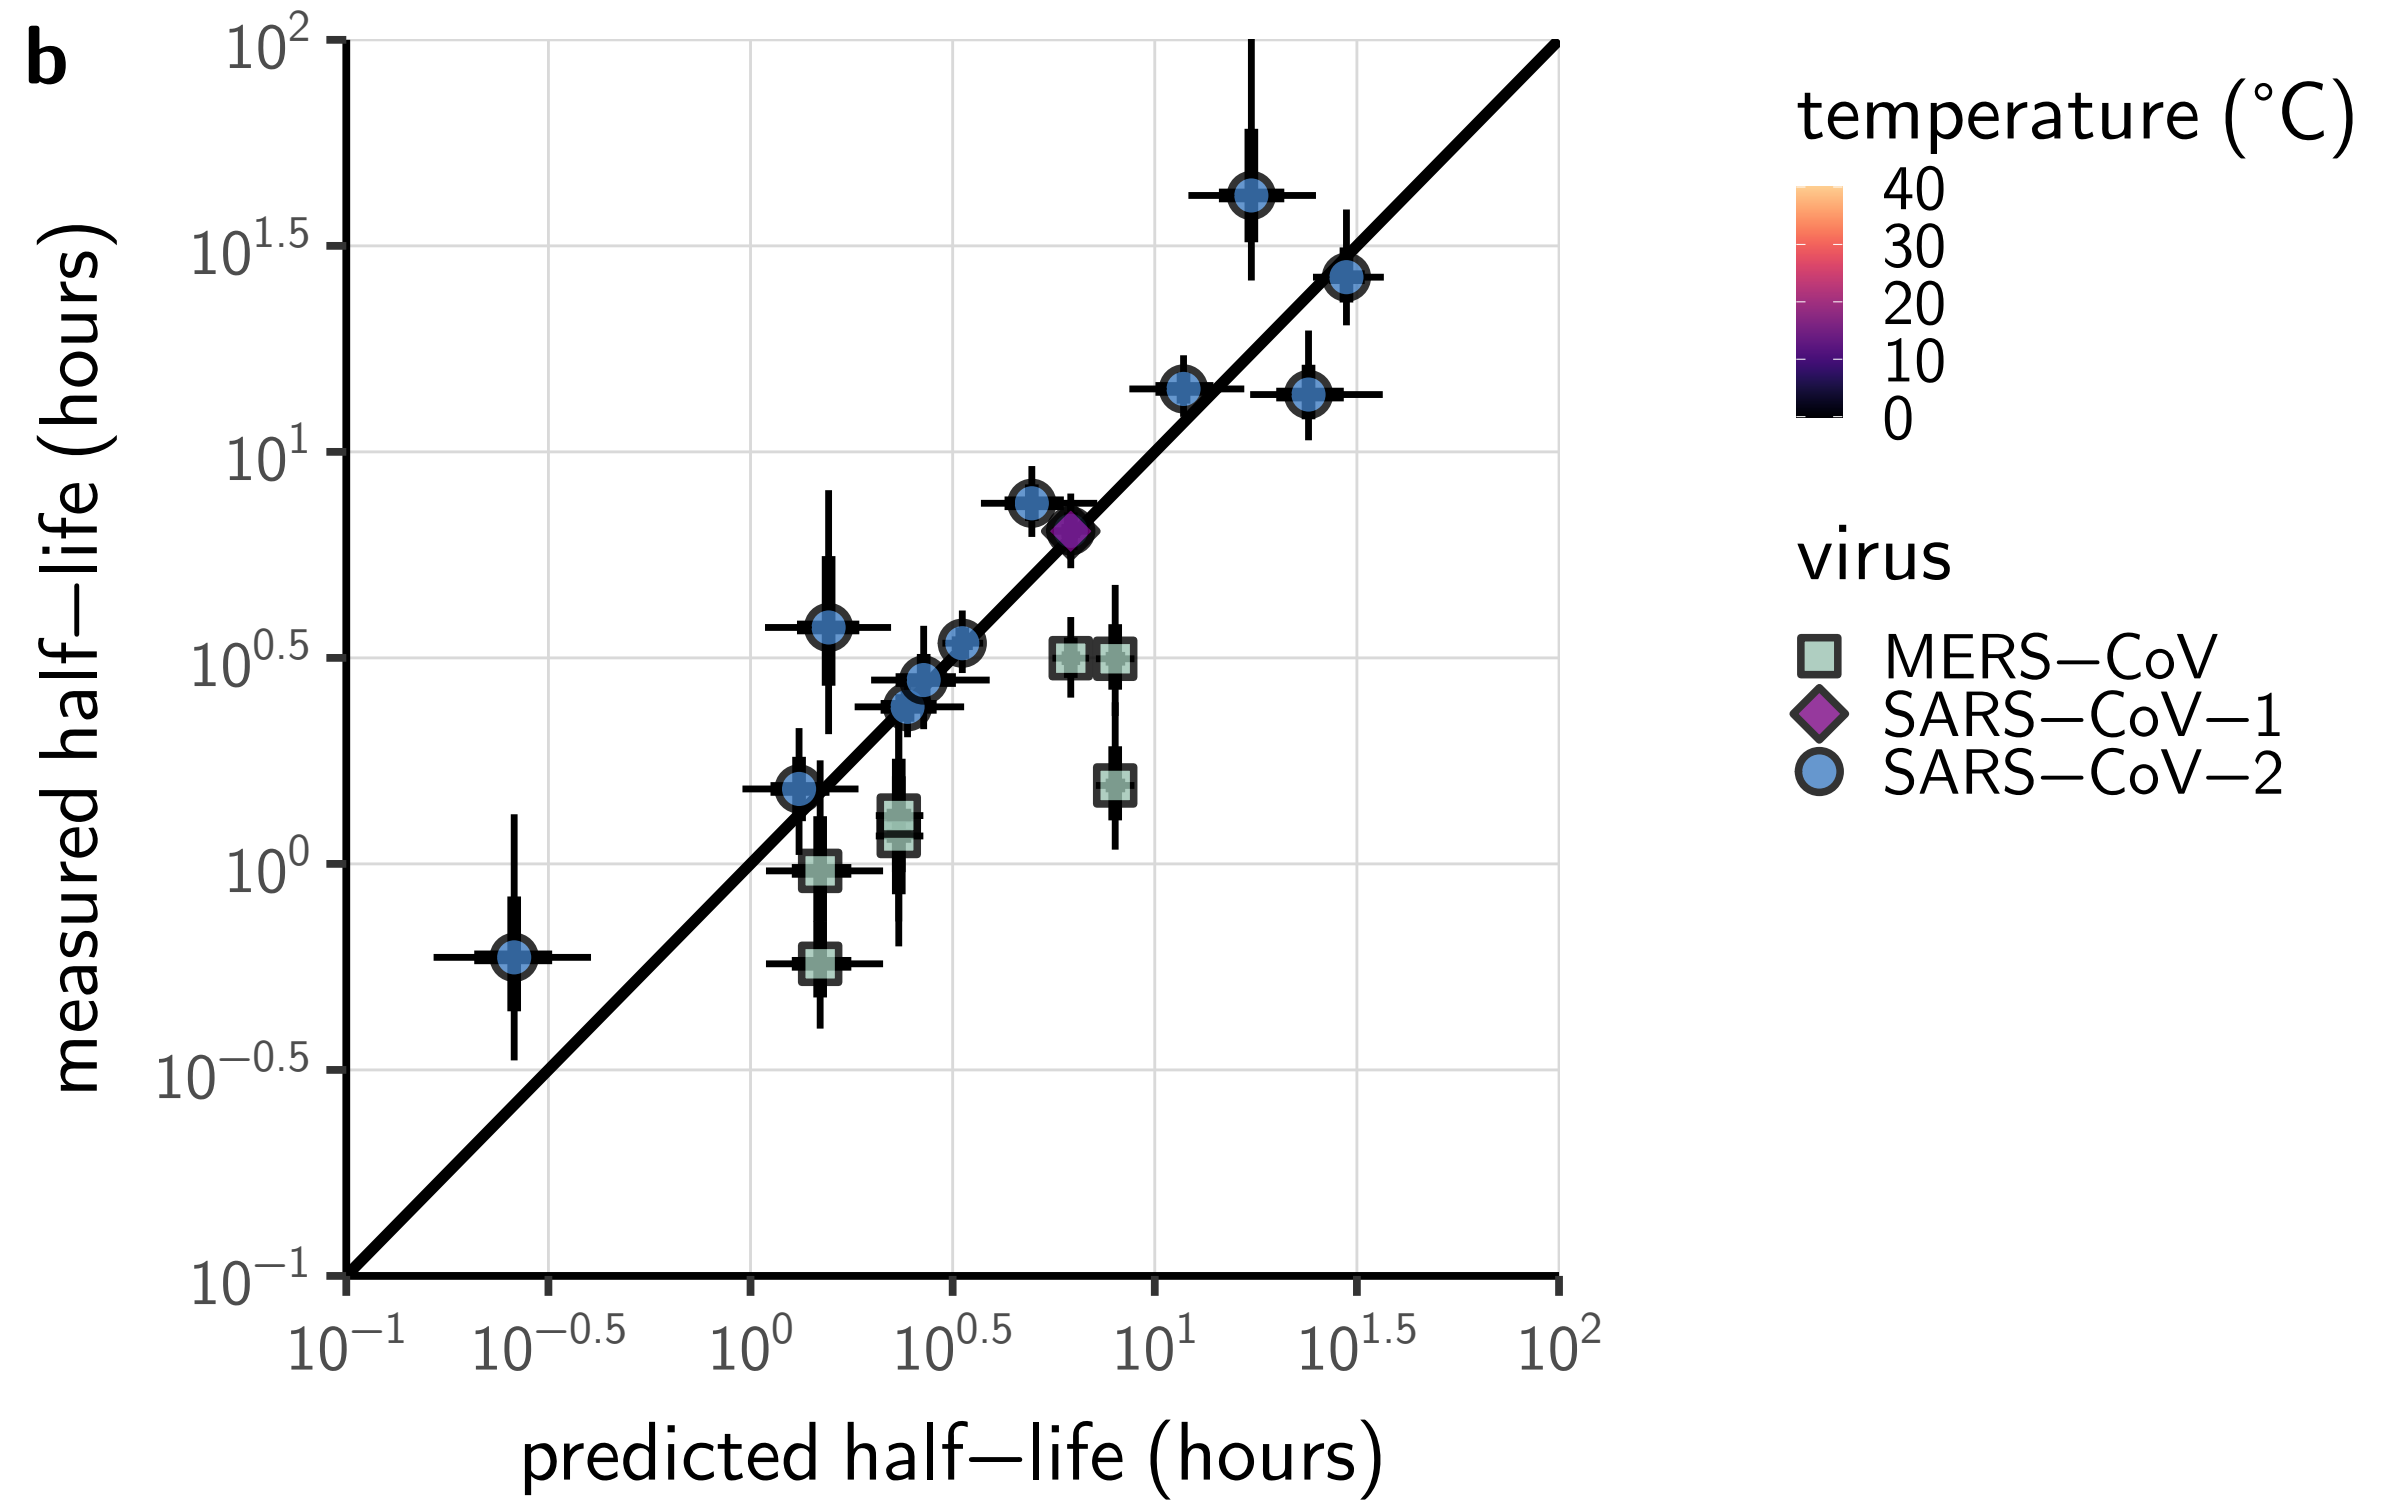

Supplement: supp [file elife-65902-supp-v1.zip › elife_poa_e65902_Figure_3_figure_supplement_1.pdf]
